# Supplementary material
Source: ML conference proceedings conference paper supplement (https://www.ecva.net/papers/eccv_2020/papers_ECCV/html/123610715_ECCV_2020_paper.php)
Supplement: Supplementary file 4 [file 123610715-supp.zip]

VOC  $\rightarrow$  Clipart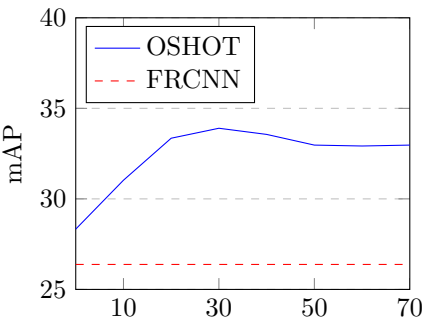VOC  $\rightarrow$  Comic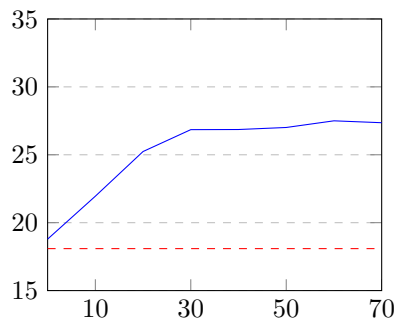VOC  $\rightarrow$  Watercolor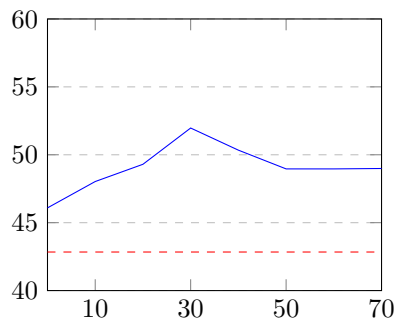Cityscapes  $\rightarrow$  Foggy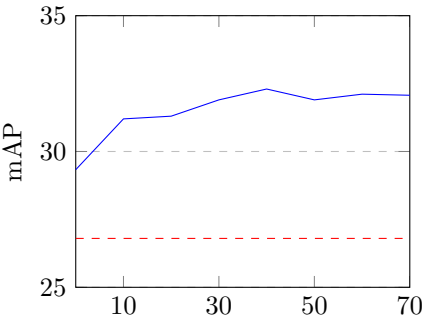Cityscapes  $\rightarrow$  KITTI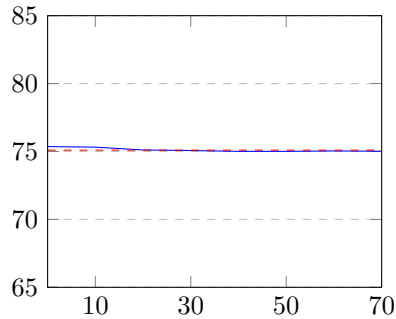KITTI  $\rightarrow$  Cityscapes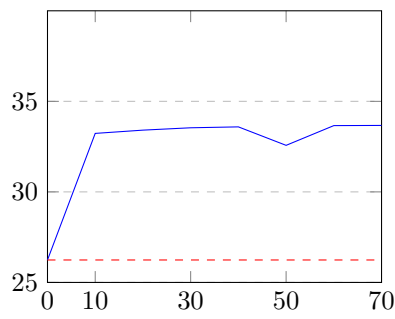

Number of iterations
