# Supplementary material
Source: ML conference proceedings conference paper supplement (https://www.ecva.net/papers/eccv_2020/papers_ECCV/html/123610715_ECCV_2020_paper.php)
Supplement: Supplementary file 11 [file 123610715-supp.zip]

Archive with 33 entries (30 files):
- 2621-supp/
- 2621-supp/README.txt
- 2621-supp/ablation_appendix.tex
- 2621-supp/comment.sty
- 2621-supp/cvpr_eso.sty
- 2621-supp/egbib.bib
- 2621-supp/eso-pic.sty
- 2621-supp/full_tables.tex
- 2621-supp/images/
- 2621-supp/images/Data_Plot_2d.pdf
- 2621-supp/images/gradcam_box-crop.pdf
- 2621-supp/images/pie_chart_cityscapes-crop.pdf
- 2621-supp/images/pie_chart_clipart-crop.pdf
- 2621-supp/images/pie_chart_comic-crop.pdf
- 2621-supp/images/pie_chart_foggy-crop.pdf
- 2621-supp/images/pie_chart_kitti-crop.pdf
- 2621-supp/images/pie_chart_watercolor-crop.pdf
- 2621-supp/images/qualitative-crop.pdf
- 2621-supp/llncs.cls
- 2621-supp/main.bbl
- 2621-supp/2621-supp.pdf
- 2621-supp/main.tex
- 2621-supp/pgf-pie.sty
- 2621-supp/pseudo_appendix.tex
- 2621-supp/qualitative_appendix.tex
- 2621-supp/ruler.sty
- 2621-supp/splncs.bst
- 2621-supp/splncs04.bst
- 2621-supp/tables/
- 2621-supp/tables/city2foggy.tex
- 2621-supp/tables/lambda.tex
- 2621-supp/tables/pseudo.tex
- 2621-supp/tables/voc2amd.tex
