# Supplementary material
Source: ML conference proceedings conference paper supplement (https://www.ecva.net/papers/eccv_2020/papers_ECCV/html/123610715_ECCV_2020_paper.php)
Supplement: Supplementary file 11 [file 123610715-supp.zip › 2621-supp/ablation_appendix.tex]

\section{Full Ablation Results}
\subsubsection{Detection error analysis}
We complete here the detection error analysis that was only partially included in the main paper for space reasons. Specifically we consider all the three domain shift cases of VOC $\rightarrow$ AMD together with Cityscapes $\rightarrow$ Foggy Cityscapes, KITTI $\rightarrow$ Cityscapes and KITTI $\rightarrow$ Cityscapes. As reported in the main paper, for the first benchmark VOC $\rightarrow$ Clipart we follow \cite{hoiem2012diagnosing,diversify&match_Kim_2019_CVPR} considering the top $1k$ most confident detections and identifying three error types: correct (IoUgt $\geqslant$ 0.5), mislocalized (0.3 $\leqslant$ IoUgt $<$ 0.5) and background (IoUgt $<$ 0.3). For VOC $\rightarrow$ Comic and VOC $\rightarrow$ Watercolor we consider $2k$ most confident predictions, maintaining the same ratio of the first case given that the number of target samples is twice that of Clipart. A similar reasoning, that also takes care of the class cardinality, was applied to choose 6k most confident predictions for Foggy Cityscapes $\rightarrow$ Cityscapes, 1.5k for KITTI $\rightarrow$ Cityscapes and 20k for Cityscapes $\rightarrow$ KITTI.
\begin{figure}[tb]
    \centering
    \begin{tabular}{cc}
         \scriptsize{VOC $\rightarrow$ Clipart} & \hspace{2mm}\raisebox{-.5\height}{\includegraphics[width=0.75\textwidth]{images/pie_chart_clipart-crop.pdf}}\\
         \scriptsize{VOC $\rightarrow$ Comic} & \hspace{2mm}\raisebox{-.5\height}{\includegraphics[width=0.75\textwidth]{images/pie_chart_comic-crop.pdf}}\\
         \scriptsize{VOC $\rightarrow$ Watercolor} & \hspace{2mm}\raisebox{-.5\height}{\includegraphics[width=0.75\textwidth]{images/pie_chart_watercolor-crop.pdf}}\\
    \end{tabular}
    \caption{Detection error analysis on the three cases of VOC $\rightarrow$ AMD}
    \label{fig:comicdet}
\end{figure}
\begin{figure}[h!]
    \centering
    \begin{tabular}{cc}
         \scriptsize{Citys. $\rightarrow$ Foggy Citys.} &  \hspace{1mm}\raisebox{-.5\height}{\includegraphics[width=0.75\textwidth]{images/pie_chart_foggy-crop.pdf}}\\ 
         \scriptsize{KITTI $\rightarrow$ Citys.} & \hspace{1mm}\raisebox{-.5\height}{\includegraphics[width=0.75\textwidth]{images/pie_chart_cityscapes-crop.pdf}}\\
         \scriptsize{Citys. $\rightarrow$ KITTI} & \hspace{1mm}\raisebox{-.5\height}{\includegraphics[width=0.75\textwidth]{images/pie_chart_kitti-crop.pdf}}\\
    \end{tabular}
    \caption{Detection error analysis on the three cases of urban scenes}
    \label{fig:urbandet}
\end{figure}
From Figure \ref{fig:comicdet} we can state that for both Clipart and Watercolor the advantage of adding the self-supervised task at training time is limited ($\gamma=0$), while the gain becomes evident when the number of adaptive iterations grows ($\gamma=30$). For Comic the improvement in performance appears already in the pretraining phase and further increases with adaptation. Overall the false positive errors decrease, while the ratio between the mislocalization error and correct localizations either decreases (Clipar, Comic) or remains stable (Watercolor).
A similar behaviour can be observed on the urban scenes, both when testing on Foggy Cityscapes and Cityscapes, as shown in the first two rows of Figure \ref{fig:urbandet}. For the last case of testing on KITTI, the results remain almost stable, confirming the same trend observed on the overall mAP performance discussed in the main paper. A neglegible drop of $0.7\%$ correct predictions appear when applying the adaptation phase for $\gamma=30$.

\begin{figure}[tb]
    \centering
    \includegraphics[width=0.8\textwidth]{images/Data_Plot_2d.pdf}
    \caption{\our at different number of iterations for all testbeds}
    \label{fig:selfsupit}
\end{figure}{}
\subsubsection{Self-supervised iterations}
We report results of \our at different number of self-supervised iterations in Figure \ref{fig:selfsupit}.
We observe positive correlations between the number of self-supervised iterations and the final mAP on all targets except KITTI, for which the final results are minimally affected by our adaptation procedure
(as well as by any other adaptive method used as reference - see Table 5 of the main paper).
The first 10 iterations show the most significant mAP change, while it gets to a stable plateau for further iterations.
