# Supplementary material
Source: ML conference proceedings conference paper supplement (https://www.ecva.net/papers/eccv_2020/papers_ECCV/html/123610715_ECCV_2020_paper.php)
Supplement: Supplementary file 11 [file 123610715-supp.zip › 2621-supp/egbib.bib]

@InProceedings{Peng_2019_ICCV,
author = {Peng, Xingchao and Bai, Qinxun and Xia, Xide and Huang, Zijun and Saenko, Kate and Wang, Bo},
title = {Moment Matching for Multi-Source Domain Adaptation},
booktitle = {ICCV},
year = {2019}
} 

@inproceedings{hoiem2012diagnosing,
  title={Diagnosing error in object detectors},
  author={Hoiem, Derek and Chodpathumwan, Yodsawalai and Dai, Qieyun},
  booktitle={ECCV},
  year={2012},
}

@article{kitti,
  title={Vision meets robotics: The kitti dataset},
  author={Geiger, Andreas and Lenz, Philip and Stiller, Christoph and Urtasun, Raquel},
  journal={The International Journal of Robotics Research},
  volume={32},
  number={11},
  pages={1231--1237},
  year={2013},
  publisher={Sage Publications Sage UK: London, England}
}


@article{geos,
  title={Learning to Generalize One Sample at a Time with Self-Supervision},
  author={ D'Innocente, Antonio and  Bucci, Silvia and  Caputo, Barbara and Tommasi, Tatiana },
  journal={arXiv preprint 1910.03915},
  year={2019}
}

@article{efrostesttime,
  title={Test-Time Training for Out-of-Distribution Generalization},
  author={ Sun, Yu and  Wang, Xiaolong and  Liu, Zhuang and  Miller, John and  Efros, Alexei A. and  Hardt,Moritz},
  journal={arXiv preprint 1909.13231},
  year={2019}
}


@InProceedings{Zhang_2019_ICCV,
author = {Zhang, Haichao and Wang, Jianyu},
title = {Towards Adversarially Robust Object Detection},
booktitle = {ICCV},
year = {2019}
} 


@InProceedings{Yang_2019_ICCV,
author = {Yang, Hao and Wu, Hao and Chen, Hao},
title = {Detecting 11K Classes: Large Scale Object Detection Without Fine-Grained Bounding Boxes},
booktitle = {ICCV},
year = {2019}
} 

@InProceedings{Tian_2019_ICCV,
author = {Tian, Zhi and Shen, Chunhua and Chen, Hao and He, Tong},
title = {FCOS: Fully Convolutional One-Stage Object Detection},
booktitle = {ICCV},
year = {2019}
} 

@inproceedings{extremeclick,
  author    = {Dim P. Papadopoulos and
               Jasper R. R. Uijlings and
               Frank Keller and
               Vittorio Ferrari},
  title     = {Extreme Clicking for Efficient Object Annotation},
  booktitle = {ICCV},
  year      = {2017}
}


%%%%% DA detection papers %%%%%%
@InProceedings{diversify&match_Kim_2019_CVPR,
author = {Kim, Taekyung and Jeong, Minki and Kim, Seunghyeon and Choi, Seokeon and Kim, Changick},
title = {Diversify and Match: A Domain Adaptive Representation Learning Paradigm for Object Detection},
booktitle = {CVPR},
year = {2019}
} 

@InProceedings{robust_Khodabandeh_2019_ICCV,
author = {Khodabandeh, Mehran and Vahdat, Arash and Ranjbar, Mani and Macready, William G.},
title = {A Robust Learning Approach to Domain Adaptive Object Detection},
booktitle = {ICCV},
year = {2019}
} 

@InProceedings{kim2019selftraining,
author = {Kim, Seunghyeon and Choi, Jaehoon and Kim, Taekyung and Kim, Changick},
title = {Self-Training and Adversarial Background Regularization for Unsupervised Domain Adaptive One-Stage Object Detection},
booktitle = {ICCV},
year = {2019}
}

@InProceedings{inoue2018cross,
author = {Inoue, Naoto and Furuta, Ryosuke and Yamasaki, Toshihiko and Aizawa, Kiyoharu},
title = {Cross-Domain Weakly-Supervised Object Detection Through Progressive Domain Adaptation},
booktitle = {CVPR},
year = {2018}
} 

@InProceedings{Zhu_2019_CVPR,
author = {Zhu, Xinge and Pang, Jiangmiao and Yang, Ceyuan and Shi, Jianping and Lin, Dahua},
title = {Adapting Object Detectors via Selective Cross-Domain Alignment},
booktitle = {CVPR},
year = {2019}
} 

@InProceedings{Saito_2019_CVPR,
author = {Saito, Kuniaki and Ushiku, Yoshitaka and Harada, Tatsuya and Saenko, Kate},
title = {Strong-Weak Distribution Alignment for Adaptive Object Detection},
booktitle = {CVPR},
year = {2019}
} 

@InProceedings{Chen_2018_CVPR,
author = {Chen, Yuhua and Li, Wen and Sakaridis, Christos and Dai, Dengxin and Van Gool, Luc},
title = {Domain Adaptive Faster R-CNN for Object Detection in the Wild},
booktitle = {CVPR},
year = {2018}
} 

@InProceedings{Xie_2019_ICCV_Workshops,
author = {Xie, Rongchang and Yu, Fei and Wang, Jiachao and Wang, Yizhou and Zhang, Li},
title = {Multi-Level Domain Adaptive Learning for Cross-Domain Detection},
booktitle = {ICCV Workshops},
year = {2019}
}


%%%%%%%%

@inproceedings{redmon2016you,
  title={You only look once: Unified, real-time object detection},
  author={Redmon, Joseph and Divvala, Santosh and Girshick, Ross and Farhadi, Ali},
  booktitle={CVPR},
  year={2016}
}

@inproceedings{larsson2017colorization,
  title={Colorization as a proxy task for visual understanding},
  author={Larsson, Gustav and Maire, Michael and Shakhnarovich, Gregory},
  booktitle={CVPR},
  year={2017}
}

@inproceedings{noroozi2016unsupervised,
  title={Unsupervised learning of visual representations by solving jigsaw puzzles},
  author={Noroozi, Mehdi and Favaro, Paolo},
  booktitle={ECCV},
  year={2016},
}

@inproceedings{doersch2015unsupervised,
  title={Unsupervised visual representation learning by context prediction},
  author={Doersch, Carl and Gupta, Abhinav and Efros, Alexei A},
  booktitle={ICCV},
  year={2015}
}

@inproceedings{girshick2014rich,
  title={Rich feature hierarchies for accurate object detection and semantic segmentation},
  author={Girshick, Ross and Donahue, Jeff and Darrell, Trevor and Malik, Jitendra},
  booktitle={CVPR},
  year={2014}
}

@misc{lufficc2018ssd,
    author = {Congcong Li},
    title = {{High quality, fast, modular reference implementation of SSD in PyTorch}},
    year = {2018},
    howpublished = {\url{https://github.com/lufficc/SSD}}
}

@misc{massa2018mrcnn,
author = {Massa, Francisco and Girshick, Ross},
title = {{maskrcnn-benchmark: Fast, modular reference implementation of Instance Segmentation and Object Detection algorithms in PyTorch}},
year = {2018},
howpublished = {\url{https://github.com/facebookresearch/maskrcnn-benchmark}},
note = {Accessed: 22/08/2019}
}


@inproceedings{niitani2017chainercv,
  title={ChainerCV: a library for deep learning in computer vision},
  author={Niitani, Yusuke and Ogawa, Toru and Saito, Shunta and Saito, Masaki},
  booktitle={ACM international conference on Multimedia},
  year={2017}
}

@inproceedings{Tobin2017DomainRF,
  title={Domain randomization for transferring deep neural networks from simulation to the real world},
  author={Joshua Tobin and Rachel H Fong and Alex Ray and Jonas Schneider and Wojciech Zaremba and Pieter Abbeel},
  journal={IEEE/RSJ IROS},
  year={2017}
}


@article{everingham2010pascal,
  title={The pascal visual object classes (voc) challenge},
  author={Everingham, Mark and Van Gool, Luc and Williams, Christopher KI and Winn, John and Zisserman, Andrew},
  journal={IJCV},
  volume={88},
  number={2},
  pages={303--338},
  year={2010},
  publisher={Springer}
}

@article{simonyan2014very,
  title={Very deep convolutional networks for large-scale image recognition},
  author={Simonyan, Karen and Zisserman, Andrew},
  journal={arXiv preprint arXiv:1409.1556},
  year={2014}
}

@inproceedings{cordts2016cityscapes,
  title={The cityscapes dataset for semantic urban scene understanding},
  author={Cordts, Marius and Omran, Mohamed and Ramos, Sebastian and Rehfeld, Timo and Enzweiler, Markus and Benenson, Rodrigo and Franke, Uwe and Roth, Stefan and Schiele, Bernt},
  booktitle={CVPR},
  year={2016}
}

@inproceedings{girshick2015fast,
  title={Fast r-cnn},
  author={Girshick, Ross},
  booktitle={ICCV},
  year={2015}
}

@article{sakaridis2018semantic,
  title={Semantic foggy scene understanding with synthetic data},
  author={Sakaridis, Christos and Dai, Dengxin and Van Gool, Luc},
  journal={IJCV},
  volume={126},
  number={9},
  pages={973--992},
  year={2018},
  publisher={Springer}
}

@inproceedings{liu2016ssd,
  title={Ssd: Single shot multibox detector},
  author={Liu, Wei and Anguelov, Dragomir and Erhan, Dumitru and Szegedy, Christian and Reed, Scott and Fu, Cheng-Yang and Berg, Alexander C},
  booktitle={ECCV},
  year={2016},
  organization={Springer}
}

@inproceedings{ren2015faster,
  title={Faster r-cnn: Towards real-time object detection with region proposal networks},
  author={Ren, Shaoqing and He, Kaiming and Girshick, Ross and Sun, Jian},
  booktitle={NIPS},
  year={2015}
}

@article{Ganin:DANN:JMLR16,
author = {Ganin, Yaroslav and Ustinova, Evgeniya and Ajakan, Hana and Germain, Pascal and Larochelle, Hugo and Laviolette, Fran\c{c}ois and Marchand, Mario and Lempitsky, Victor},
 title = {Domain-adversarial Training of Neural Networks},
 journal = {JMLR},
 volume = {17},
 number = {1},
 year={2016},
 pages = {2096--2030},
 publisher={JMLR. org}
} 

@inproceedings{russo17sbadagan,
  title={From source to target and back: symmetric bi-directional adaptive GAN},
  author={Russo, Paolo and Carlucci, Fabio Maria and Tommasi, Tatiana and Caputo, Barbara},
  booktitle={CVPR},
  year={2018}
}

@article{carlucci2018text,
  title={(DE)2CO: Deep Depth Colorization},
  author={Carlucci, Fabio Maria and Russo, Paolo and Caputo, Barbara},
  journal={IEEE RA-L},
  year={2018},
  publisher={IEEE}
}

@inproceedings{Bousmalis:Google:CVPR17,
title = {Unsupervised Pixel-level Domain Adaptation with GANs},
author  = {Konstantinos Bousmalis and Nathan Silberman and David Dohan and Dumitru Erhan and Dilip Krishnan},
booktitle={CVPR},
year={2017}
}

@InProceedings{haeusser17,
  author = 	 "P. Haeusser and T. Frerix and A. Mordvintsev and D. Cremers",
  title = 	 "Associative Domain Adaptation",
  booktitle={ICCV},
  year = 	 "2017"
}

@InProceedings{gtsrb,
title = "The German traffic sign recognition benchmark: a multi-class classification competition",
author = "Johannes Stallkamp and Marc Schlipsing and Jan Salmen and Christian Igel",
year = "2011",
booktitle = "IJCNN"
}

@inproceedings{Moiseev:2013,
 author = {Moiseev, Boris and Konev, Artem and Chigorin, Alexander and Konushin, Anton},
 title = {Evaluation of Traffic Sign Recognition Methods Trained on Synthetically Generated Data},
 booktitle = {ACIVS},
 year = {2013}
} 

@inproceedings{Hoffman:Adda:CVPR17,
author={Eric Tzeng and Judy Hoffman and Trevor Darrell and Kate Saenko},
title={Adversarial Discriminative Domain Adaptation},
booktitle={CVPR},
year={2017}
}

@inproceedings{Bousmalis:DSN:NIPS16,
  title = {{Domain Separation Networks}},
  author = {Bousmalis, Konstantinos and Trigeorgis, George and Silberman, Nathan and Krishnan, Dilip and Erhan, Dumitru},
  booktitle = {NIPS},
  year = {2016}
}

@incollection{Liu:coGAN:NIPS16,
title = {Coupled Generative Adversarial Networks},
author = {Liu, Ming-Yu and Tuzel, Oncel},
booktitle = {NIPS},
year = {2016}
}

@article{Tzeng:MMD:arxiv14,
  title={Deep domain confusion: Maximizing for domain invariance},
  author={Tzeng, Eric and  Hoffman,Judy and Zhang, Ning and Saenko, Kate and Darrell, Trevor},
  journal={arXiv preprint:1412.3474},
  year={2014}
}

@inproceedings{Tzeng_ICCV2015,
author={Eric Tzeng and Judy Hoffman and Trevor Darrell and Kate Saenko},
title={Simultaneous Deep Transfer Across Domains and Tasks},
booktitle={ICCV},
year={2015}
}


@inproceedings{Sun:CORAL:AAAI16,
  author={Baochen Sun and Jiashi Feng and Kate Saenko},
  title={Return of Frustratingly Easy Domain Adaptation},
  booktitle={AAAI},
  year={2016}
}

@inproceedings{kingma2014adam,
  title={Adam: A method for stochastic optimization},
  author={Kingma, Diederik and Ba, Jimmy},
  booktitle={ICLR},
  year={2015}
}

@misc{chollet2017,
author = {François Chollet },
title = {keras},
year = {2017},
publisher = {GitHub},
journal = {GitHub repository},
howpublished = {\url{https://github.com/fchollet/keras}},
commit = {c627fa5}
}

@inproceedings{ganin2014unsupervised,
  title={Unsupervised domain adaptation by backpropagation},
  author={Ganin, Yaroslav and Lempitsky, Victor},
  booktitle={ICML},
  year={2015}
}

@article{lecun1998gradient,
  title={Gradient-based learning applied to document recognition},
  author={LeCun, Yann and Bottou, L{\'e}on and Bengio, Yoshua and Haffner, Patrick},
  journal={Proceedings of the IEEE},
  volume={86},
  number={11},
  pages={2278--2324},
  year={1998},
  publisher={IEEE}
}

@article{arbelaez2011contour,
  title={Contour detection and hierarchical image segmentation},
  author={Arbelaez, Pablo and Maire, Michael and Fowlkes, Charless and Malik, Jitendra},
  journal = {IEEE Trans. PAMI},
  volume={33},
  number={5},
  pages={898--916},
  year={2011}
}

@inproceedings{netzer2011reading,
  title={Reading digits in natural images with unsupervised feature learning},
  author={Netzer, Yuval and Wang, Tao and Coates, Adam and Bissacco, Alessandro and Wu, Bo and Ng, Andrew Y},
  booktitle={NIPS workshop on deep learning and unsupervised feature learning},
  year={2011}
}

@book{friedman2001elements,
  title={The elements of statistical learning},
  author={Friedman, Jerome and Hastie, Trevor and Tibshirani, Robert},
  volume={1},
  year={2001},
  publisher={Springer series in statistics Springer, Berlin}
}

@incollection{Goodfellow:GAN:NIPS2014,
title = {Generative Adversarial Nets},
author = {Goodfellow, Ian and Pouget-Abadie, Jean and Mirza, Mehdi and Xu, Bing and Warde-Farley, David and Ozair, Sherjil and Courville, Aaron and Bengio, Yoshua},
booktitle = {NIPS},
year = {2014}
}

@article{Mirza:cGAN:arXiv2014,
  author    = {Mehdi Mirza and
               Simon Osindero},
  title     = {Conditional Generative Adversarial Nets},
  journal={arXiv preprint:1411.1784},
  year={2014}
}

@inproceedings{CycleGAN2017,
  title={Unpaired Image-to-Image Translation using Cycle-Consistent Adversarial Networks},
  author={Zhu, Jun-Yan and Park, Taesung and Isola, Phillip and Efros, Alexei A},
  booktitle={ICCV},
  year={2017}
}


@inproceedings{DBLP:conf/icml/KimCKLK17,
  author    = {Taeksoo Kim and
               Moonsu Cha and
               Hyunsoo Kim and
               Jung Kwon Lee and
               Jiwon Kim},
  title     = {Learning to Discover Cross-Domain Relations with Generative Adversarial
               Networks},
  booktitle = {ICML},
  year      = {2017}
}


@inproceedings{Salimans:improvedGAN:NIPS16,
  author    = {Tim Salimans and
               Ian J. Goodfellow and
               Wojciech Zaremba and
               Vicki Cheung and
               Alec Radford and
               Xi Chen},
  title     = {Improved Techniques for Training GANs},
  booktitle = {NIPS},
  year      = {2016}
 }
 
 
@inproceedings{WenLi:ECCV2016,
author="Ghifary, Muhammad
and Kleijn, W. Bastiaan
and Zhang, Mengjie
and Balduzzi, David
and Li, Wen",
booktitle = "ECCV",
title="Deep Reconstruction-Classification Networks for Unsupervised Domain Adaptation",
year="2016"
}


@inproceedings{carlucci2017auto,
  title={AutoDIAL: Automatic DomaIn Alignment Layers},
  author={Carlucci, Fabio Maria and Porzi, Lorenzo and Caputo, Barbara and Ricci, Elisa and Rota Bul{\`o}, Samuel},
  booktitle={ICCV},
  year={2017}
}

@inproceedings{carlucci2017just,
  title={Just DIAL: domain alignment layers for unsupervised domain adaptation},
  author={Carlucci, Fabio Maria and Porzi, Lorenzo and Caputo, Barbara and Ricci, Elisa and Rota Bul{\`o}, Samuel},
  booktitle={ICIAP},
  year={2017}
}

@inproceedings{Gatys2016a,
  author = "L. A. Gatys and A. S. Ecker and M. Bethge",
  title = "Image Style Transfer Using Convolutional Neural Networks",
  year = 2016,
  booktitle = "CVPR"
}

@inproceedings{Johnson2016Perceptual,
  title={Perceptual losses for real-time style transfer and super-resolution},
  author={Johnson, Justin and Alahi, Alexandre and Fei-Fei, Li},
  booktitle={ECCV},
  year={2016}
}

@inproceedings{Shrivastava:cvpr:17,
  author    = {Ashish Shrivastava and
               Tomas Pfister and
               Oncel Tuzel and
               Josh Susskind and
               Wenda Wang and
               Russ Webb},
  title     = {Learning from Simulated and Unsupervised Images through Adversarial
               Training},
  booktitle = "CVPR",
  year      = {2017}
}

@inproceedings{Taigman2016UnsupervisedCI,
  title={Unsupervised Cross-Domain Image Generation},
  author={Yaniv Taigman and Adam Polyak and Lior Wolf},
  booktitle={ICLR},
  year={2017}
}

@inproceedings{sankaranarayanan2017generate,
  title={Generate To Adapt: Aligning Domains using Generative Adversarial Networks},
  author={Sankaranarayanan, Swami and Balaji, Yogesh and Castillo, Carlos D and Chellappa, Rama},
booktitle={CVPR},
year={2018}
}

@article{mao2016multi,
  title={Multi-class Generative Adversarial Networks with the L2 Loss Function},
  author={Mao, Xudong and Li, Qing and Xie, Haoran and Lau, Raymond YK and Wang, Zhen},
  journal={arXiv preprint:1611.04076},
  year={2016}
}

@InProceedings{pmlr-v70-odena17a,
  title = 	 {Conditional Image Synthesis with Auxiliary Classifier {GAN}s},
  author = 	 {Augustus Odena and Christopher Olah and Jonathon Shlens},
  booktitle = {ICML},
  year = 	 {2017}
}

@inproceedings{ioffe2015batch,
  title={Batch normalization: Accelerating deep network training by reducing internal covariate shift},
  author={Ioffe, Sergey and Szegedy, Christian},
  booktitle={ICML},
  year={2015}
}

@article{maaten2008visualizing,
  title={Visualizing data using t-SNE},
  author={Maaten, Laurens van der and Hinton, Geoffrey},
  journal={JMLR},
  volume={9},
  number={Nov},
  pages={2579--2605},
  year={2008}
}

@InProceedings{cycada,
  title = 	 {{C}y{CADA}: Cycle-Consistent Adversarial Domain Adaptation},
  author = 	 {Hoffman, Judy and Tzeng, Eric and Park, Taesung and Zhu, Jun-Yan and Isola, Phillip and Saenko, Kate and Efros, Alexei and Darrell, Trevor},
  booktitle = 	 {ICML},
  year = 	 {2018}
}

@inproceedings{visdawinners,
  title={Self-ensembling for visual domain adaptation},
  booktitle={Blind Submission, ICLR},
  year={2018}
}


@incollection{TRUDA-NIPS16_savarese,
title = {Learning Transferrable Representations for Unsupervised Domain Adaptation},
author = {Sener, Ozan and Song, Hyun Oh and Saxena, Ashutosh and Savarese, Silvio},
booktitle = {NIPS},
year = {2016}
}

@article{BruzzonePAMI,
  author = {Bruzzone, Lorenzo and Marconcini, Mattia},
  journal = {IEEE Trans. PAMI},
  number = 5,
  pages = {770-787},
  title = {Domain Adaptation Problems: A DASVM Classification Technique and a Circular Validation Strategy.},
  volume = 32,
  year = 2010
}

@article{Morvant15,
  author    = {Emilie Morvant},
  title     = {Domain adaptation of weighted majority votes via perturbed variation-based
               self-labeling},
  journal   = {Pattern Recognition Letters},
  volume    = {51},
  pages     = {37--43},
  year      = {2015}
}


@article{HabrardPS13,
  author = {Habrard, Amaury and Peyrache, Jean-Philippe and Sebban, Marc},
  journal = {IJAIT},
  number = 5,
  title = {Iterative Self-Labeling Domain Adaptation for Linear Structured Image Classification.},
  volume = 22,
  year = 2013
}

@article{Wang:2004:IQA,
 author = {Wang, Zhou and Bovik, A. C. and Sheikh, H. R. and Simoncelli, E. P.},
 title = {Image Quality Assessment: From Error Visibility to Structural Similarity},
 journal = {Trans. Img. Proc.},
 issue_date = {April 2004},
 volume = {13},
 number = {4},
 month = apr,
 year = {2004},
 pages = {600--612}
} 

@inproceedings{liu2017unsupervised,
  title={Unsupervised Image-to-Image Translation Networks},
  author={Liu, Ming-Yu and Breuel, Thomas and Kautz, Jan},
  booktitle = {NIPS},
  year = {2017}
}

@inproceedings{saito2017asymmetric,
  title={Asymmetric Tri-training for Unsupervised Domain Adaptation},
  author={Saito, Kuniaki and Ushiku, Yoshitaka and Harada, Tatsuya},
  booktitle={ICML},
  year={2017}
}

@inproceedings{Saenko:2010,
 author = {Saenko, Kate and Kulis, Brian and Fritz, Mario and Darrell, Trevor},
 title = {Adapting Visual Category Models to New Domains},
 booktitle = {ECCV},
 year = {2010}
} 

@inproceedings{MLDG_AAA18,
  author    = {Da Li and
               Yongxin Yang and
               Yi{-}Zhe Song and
               Timothy M. Hospedales},
  title     = {Learning to Generalize: Meta-Learning for Domain Generalization},
  booktitle = {AAAI},
  year      = {2018}
}

% MULTISOURCE PRACTICE %%%%%%%%%%%%%%%%%%%%%%%%%%%
@inproceedings{cocktail_CVPR18,
  author    = {Ruijia Xu and
               Ziliang Chen and
               Wangmeng Zuo and
               Junjie Yan and
               Liang Lin},
  title     = {Deep Cocktail Network: Multi-source Unsupervised Domain Adaptation
               with Category Shift},
  booktitle = {CVPR},
  year      = {2018}
}

@inproceedings{MDAN_ICLRW18,
title={Multiple Source Domain Adaptation with Adversarial Learning},
author={Han Zhao and Shanghang Zhang and Guanhang Wu and Jo\~{a}o  P. Costeira and Jos\'{e} M. F.  Moura and Geoffrey J. Gordon},
booktitle = {Workshop of ICLR-W},
year={2018}
}

@inproceedings{Duan_2009,
 author = {Duan, Lixin and Tsang, Ivor W. and Xu, Dong and Chua, Tat-Seng},
 title = {Domain Adaptation from Multiple Sources via Auxiliary Classifiers},
 booktitle = {ICML},
 year = {2009}
} 
@ARTICLE{DuanTNNLS2012,
  author = {Lixin Duan and Dong Xu and Ivor W. Tsang},
  title = {Domain Adaptation from Multiple Sources: A Domain-Dependent Regularization Approach},
  journal = {IEEE Transactions on Neural Networks and Learning Systems},
  year = {2012},
  month = {March},
  volume = {23},
  number = {3},
  pages = {504--518}
}

@inproceedings{JhuoLLC12,
  author = {Jhuo, I-Hong and Liu, Dong and Lee, D. T. and Chang, Shih-Fu},
  booktitle = {CVPR},
  title = {Robust visual domain adaptation with low-rank reconstruction.},
  year = 2012
}

@incollection{Rita_NIPS2011,
title = {A Two-Stage Weighting Framework for Multi-Source Domain Adaptation},
author = {Qian Sun and Rita Chattopadhyay and Sethuraman Panchanathan and Ye, Jieping},
booktitle = {NIPS},
year = {2011}
}

@inproceedings{Liu_ICDM16,
  author    = {Hongfu Liu and
               Ming Shao and
               Yun Fu},
  title     = {Structure-Preserved Multi-source Domain Adaptation},
  booktitle = {ICDM},
  publisher = {{IEEE}},
  year      = {2016}
}

@inproceedings{daume2007,
  author = {Daume III, Hal},
  booktitle = {Annual Meeting of the ACL},
  title = {Frustratingly Easy Domain Adaptation},
  year = 2007
}

@inproceedings{Gopalan2011,
 author = {Gopalan, Raghuraman and Ruonan Li and Chellappa, Rama},
 title = {Domain Adaptation for Object Recognition: An Unsupervised Approach},
 booktitle = {ICCV},
 year = {2011}
} 

@inproceedings{hoffman_eccv12,
  author    = {Judy Hoffman and
               Brian Kulis and
               Trevor Darrell and
               Kate Saenko},
  title     = {Discovering Latent Domains for Multisource Domain Adaptation},
  booktitle = {ECCV},
  year      = {2012}
}

@inproceedings{Mansour_NIPS09,
  author    = {Yishay Mansour and
               Mehryar Mohri and
               Afshin Rostamizadeh},
  title     = {Domain Adaptation with Multiple Sources},
  booktitle = {NIPS},
  year      = {2009}
}

@article{Crammer_JMLR08,
 author = {Crammer, Koby and Kearns, Michael and Wortman, Jennifer},
 title = {Learning from Multiple Sources},
 journal = {JMLR},
 issue_date = {6/1/2008},
 volume = {9},
 month = jun,
 year = {2008},
 issn = {1532-4435},
 pages = {1757--1774},
 numpages = {18}
} 

@incollection{Blitzer_NIPS2007,
title = {Learning Bounds for Domain Adaptation},
author = {John Blitzer and Crammer, Koby and Kulesza, Alex and Fernando Pereira and Jennifer Wortman},
booktitle = {NIPS},
editor = {J. C. Platt and D. Koller and Y. Singer and S. T. Roweis},
year = {2008}
}

@article{shelhamerdeep,
  title={Deep Layer Aggregation},
  author={Yu, Fisher  and Wang,Dequan and  Shelhamer,Evan and  Darrell, Trevor },
  journal={arXiv preprint:1707.06484},
  year = {2017}
}

@inproceedings{Long:2015,
 author = {Long, Mingsheng and Cao, Yue and Wang, Jianmin and Jordan, Michael I.},
 title = {Learning Transferable Features with Deep Adaptation Networks},
 booktitle = {ICML},
 year = {2015}
} 

@inproceedings{LongZ0J17,
  author    = {Mingsheng Long and
               Han Zhu and
               Jianmin Wang and
               Michael I. Jordan},
  title     = {Deep Transfer Learning with Joint Adaptation Networks},
  booktitle = {ICML},
  year      = {2017}
}

@inproceedings{LOAD_ICRA,
  author    = {Gabriele Angeletti and
               Barbara Caputo and
               Tatiana Tommasi},
  title     = {Adaptive Deep Learning through Visual Domain Localization},
  booktitle   = {ICRA},
  year      = {2018}
}

@inproceedings{appleGAN,
  title={Learning from Simulated and Unsupervised Images through Adversarial Training},
  author={Ashish Shrivastava and Tomas Pfister and Oncel Tuzel and Joshua Susskind and Wenda Wang and Russell Webb},
  booktitle={CVPR},
  year={2017}
}

@inproceedings{DGautoencoders,
  author    = {Muhammad Ghifary and
               W. Bastiaan Kleijn and
               Mengjie Zhang and
               David Balduzzi},
  title     = {Domain Generalization for Object Recognition with Multi-task Autoencoders},
  booktitle = {ICCV},
  year      = {2015}
}

@InProceedings{doretto2017, 
Title = {Unified Deep Supervised Domain Adaptation and Generalization},
Author = {Motiian, Saeid and Piccirilli, Marco and Adjeroh, Donald A. and Doretto, Gianfranco},
Booktitle = {ICCV},
Year = {2017}}

@INPROCEEDINGS{hospedalesPACS,
author={D. Li and Y. Yang and Y. Z. Song and T. M. Hospedales},
booktitle={ICCV},
title={Deeper, Broader and Artier Domain Generalization},
year={2017}
}
        
@inproceedings{DG_ICLR18,
title={Generalizing Across Domains via Cross-Gradient Training},
author={Shiv Shankar and Vihari Piratla and Soumen Chakrabarti and Siddhartha Chaudhuri and Preethi Jyothi and Sunita Sarawagi},
booktitle={ICLR},
year={2018}
}

@article{MassiRAL,
  title={Robust Place Categorization with Deep Domain Generalization},
  author={Massimiliano Mancini and Samuel Rota Bulo and Barbara Caputo and Elisa Ricci},
  journal={IEEE RA-L},
  year={2018}
}

@inproceedings{shallowDG,
 author = {Muandet, Krikamol and Balduzzi, David and Sch\"{o}lkopf, Bernhard},
 title = {Domain Generalization via Invariant Feature Representation},
 booktitle = {ICML},
 year = {2013}
} 

@inproceedings{rmsprop,
 author = {T. Tieleman and G. Hinton},
 title = {Lecture 6.5-rmsprop: Divide the gradient by a running average of its
recent magnitude},
 booktitle = {COURSERA: Neural Networks for Machine Learning},
 year = {2012}
} 

@inproceedings{liu2016coupled,
  title={Coupled generative adversarial networks},
  author={Liu, Ming-Yu and Tuzel, Oncel},
  booktitle={NIPS},
  year={2016}
}

@article{PAMI2018salzmann,
  title={Beyond Sharing Weights for Deep Domain Adaptation},
  author={Artem Rozantsev and Mathieu Salzmann and Pascal Fua},
  journal={IEEE Trans. PAMI},
  year={2018}
}

@InProceedings{Li_2018_CVPR,
author = {Li, Haoliang and Jialin Pan, Sinno and Wang, Shiqi and Kot, Alex C.},
title = {Domain Generalization With Adversarial Feature Learning},
booktitle = {CVPR},
year = {2018}
} 


@InProceedings{Li_2018_ECCV,
author = {Li, Ya and Tian, Xinmei and Gong, Mingming and Liu, Yajing and Liu, Tongliang and Zhang, Kun and Tao, Dacheng},
title = {Deep Domain Generalization via Conditional Invariant Adversarial Networks},
booktitle = {ECCV},
year = {2018}
}

@InProceedings{Volpi_2018_NIPS,
author = {Riccardo Volpi and Hongseok Namkoong and Ozan Sener and John Duchi and Vittorio Murino and Silvio Savarese},
title = {Generalizing to Unseen Domains via Adversarial Data Augmentation},
booktitle = {NIPS},
year = {2018}
}


@InProceedings{Antonio_GCPR18,
  title={Domain Generalization with Domain-Specific Aggregation Modules},
  author={Antonio D'Innocente and Barbara Caputo},
  booktitle={GCPR},
  year={2018}
}

@inproceedings{ECCV12_Khosla,
 author = "Aditya Khosla and Tinghui Zhou and Tomasz Malisiewicz and Alexei Efros and Antonio Torralba",
 title = "Undoing the Damage of Dataset Bias",
 booktitle = "ECCV",
 year = "2012"
}

@article{Ding2017DeepDG,
  title={Deep Domain Generalization With Structured Low-Rank Constraint},
  author={Zhengming Ding and Yun Fu},
  journal={IEEE TIP},
  year={2017},
  volume={27},
  pages={304-313}
}


%%%%%%%%%%%%%%%%%%%%%%%%%%%%%%%%%%%%%%%%%%%%%%%%%%%%%%%%%%%%%%%%
%%%%% JIGSAW FROM HERE ON %%%%%%%%%%%%%%%%%%%%%%%%%%%%%%%%%%%%%%
%%%%%%%%%%%%%%%%%%%%%%%%%%%%%%%%%%%%%%%%%%%%%%%%%%%%%%%%%%%%%%%%

@inproceedings{DoerschGE15,
  author    = {Carl Doersch and
               Abhinav Gupta and
               Alexei A. Efros},
  title     = {Unsupervised Visual Representation Learning by Context Prediction},
  booktitle = {ICCV},
  year      = {2015}
}

@inproceedings{NorooziF16,
  author    = {Mehdi Noroozi and
               Paolo Favaro},
  title     = {Unsupervised Learning of Visual Representations by Solving Jigsaw Puzzles},
  booktitle = {ECCV},
  year      = {2016}
}

@ARTICLE{patchtransformPAMI,
author = {W. T. Freeman and S. Avidan and T. S. Cho},
journal = {IEEE Trans. PAMI},
title = {The Patch Transform},
year = {2009},
volume = {32},
pages = {1489-1501}
}


@INPROCEEDINGS{geneticsolverCVPR13,
author = {N. S. Netanyahu and O. David and D. Sholomon},
booktitle = {CVPR},
title = {A Genetic Algorithm-Based Solver for Very Large Jigsaw Puzzles},
year = {2013}
}

@article{Brown:2008:ASF,
  author = "Benedict J. Brown and Corey Toler-Franklin and Diego Nehab and
    Michael Burns and David Dobkin and Andreas
    Vlachopoulos and Christos Doumas and Szymon
    Rusinkiewicz and Tim Weyrich",
  title = "A System for High-Volume Acquisition and Matching of Fresco
    Fragments: Reassembling {Theran} Wall Paintings",
  journal = "ACM TOG (Proc. SIGGRAPH)",
  year = "2008",
  month = aug,
  volume = "27",
  number = "3"
}

@inproceedings{ECCV18_PaumardPT18,
  author    = {Marie{-}Morgane Paumard and David Picard and Hedi Tabia},
  title     = {Image Reassembly Combining Deep Learning and Shortest Path Problem},
  booktitle = {ECCV},
  year      = {2018}
}

@inproceedings{CVPR16_SonMHC16,
  author    = {Kilho Son and
               Daniel Moreno and
               James Hays and
               David B. Cooper},
  title     = {Solving Small-Piece Jigsaw Puzzles by Growing Consensus},
  booktitle = {CVPR},
  year      = {2016}
}

@inproceedings{WACV18_KimCYK18,
  author    = {Dahun Kim and
               Donghyeon Cho and
               Donggeun Yoo and
               In So Kweon},
  title     = {Learning Image Representations by Completing Damaged Jigsaw Puzzles},
  booktitle = {WACV},
  year      = {2018}
}

@inproceedings{BMVC16_YuRA16,
  author    = {Rui Yu and
               Chris Russell and
               Lourdes Agapito},
  title     = {Solving Jigsaw Puzzles with Linear Programming},
  booktitle = {BMVC},
  year      = {2016}
}

@article{FreemanG64,
  author    = {H. Freeman and L. Garder},
  title     = {Apictorial Jigsaw Puzzles: The Computer Solution of a Problem in Pattern Recognition},
  journal   = {{IEEE} Trans. Electronic Computers},
  volume    = {13},
  number    = {2},
  pages     = {118--127},
  year      = {1964}
}

@inproceedings{KosibaDBGK94,
  author    = {David A. Kosiba and
               Pierre M. Devaux and
               Sanjay Balasubramanian and
               Tarak Gandhi and
               Rangachar Kasturi},
  title     = {An automatic jigsaw puzzle solver},
  booktitle = {ICPR},
  year      = {1994}
}

@InProceedings{Cruz2017,
Title = {Visual Permutation Learning},
Author = {Rodrigo Santa Cruz and Basura Fernando and Anoop Cherian and Stephen Gould},
Booktitle = {CVPR},
Year = {2017}
}

@inproceedings{GallagherCVPR12,
 author = {Gallagher, Andrew C.},
 title = {Jigsaw Puzzles with Pieces of Unknown Orientation},
 booktitle = {CVPR},
 year = {2012}
} 

@InProceedings{loop_ECCV14,
author="Son, Kilho
and Hays, James
and Cooper, David B.",
title="Solving Square Jigsaw Puzzles with Loop Constraints",
booktitle="ECCV",
year="2014"
}

@inproceedings{probabilistic_CVPR2010,
  author = {Cho, Taeg Sang and Avidan, Shai and Freeman, William T.},
  title = {A probabilistic image jigsaw puzzle solver},
  booktitle = {CVPR},
  year = 2010
}

@inproceedings{SholomonDN14,
  author    = {Dror Sholomon and
               Omid E. David and
               Nathan S. Netanyahu},
  title     = {A Generalized Genetic Algorithm-Based Solver for Very Large Jigsaw
               Puzzles of Complex Types},
  booktitle = {AAAI},
  year      = {2014}
}

@article {Marande415,
	author = {Marande, William and Burger, Gertraud},
	title = {Mitochondrial DNA as a Genomic Jigsaw Puzzle},
	volume = {318},
	number = {5849},
	pages = {415--415},
	year = {2007},
	publisher = {American Association for the Advancement of Science},
	journal = {Science}
}

@inproceedings{learningtocount,
  author    = {Mehdi Noroozi and
               Hamed Pirsiavash and
               Paolo Favaro},
  title     = {Representation Learning by Learning to Count},
  booktitle = {ICCV},
  year      = {2017}
}

@inproceedings{zhang2016colorful,
  title={Colorful Image Colorization},
  author={Zhang, Richard and Isola, Phillip and Efros, Alexei A},
  booktitle={ECCV},
  year={2016}
}

@inproceedings{misra2016unsupervised,
  title={{Shuffle and Learn: Unsupervised Learning using Temporal Order Verification}},
  author={Misra, Ishan and Zitnick, C. Lawrence and Hebert, Martial},
  booktitle={ECCV},
  year={2016}
}

@InProceedings{Fernando2017,
Title = {Self-Supervised Video Representation Learning With Odd-One-Out Networks},
Author = {Basura Fernando and Hakan Bilen and Efstratios Gavves and Stephen Gould},
Booktitle = {CVPR},
Year = {2017}
}

@inproceedings{TorralbaEfros_bias,
 author = {Torralba, A. and Efros, A. A.},
 title = {Unbiased Look at Dataset Bias},
 booktitle = {CVPR},
 year = {2011}
} 


@InProceedings{Noroozi_2018_CVPR,
author = {Noroozi, Mehdi and Vinjimoor, Ananth and Favaro, Paolo and Pirsiavash, Hamed},
title = {Boosting Self-Supervised Learning via Knowledge Transfer},
booktitle = {CVPR},
year = {2018}
} 

@inproceedings{videosiccv15,
  author    = {Xiaolong Wang and
               Abhinav Gupta},
  title     = {Unsupervised Learning of Visual Representations Using Videos},
  booktitle = {ICCV},
  year      = {2015}
}

@inProceedings{mancini2018boosting,
	author = {Mancini, Massimilano and Porzi, Lorenzo and Rota Bul\`o, Samuel and Caputo, Barbara and Ricci, Elisa},
  	title  = {Boosting Domain Adaptation by Discovering Latent Domains},
  	booktitle = {CVPR},
  	year      = {2018}
}

@inproceedings{tarvainen2017mean,
  title={Mean teachers are better role models: Weight-averaged consistency targets improve semi-supervised deep learning results},
  author={Tarvainen, Antti and Valpola, Harri},
  booktitle={NIPS},
  year={2017}
}

@inproceedings{cai2019exploring,
  title={Exploring Object Relation in Mean Teacher for Cross-Domain Detection},
  author={Cai, Qi and Pan, Yingwei and Ngo, Chong-Wah and Tian, Xinmei and Duan, Lingyu and Yao, Ting},
  booktitle={CVPR},
  year={2019}
}

@book{csurka_book,
  editor    = {Gabriela Csurka},
  title     = {Domain Adaptation in Computer Vision Applications},
  series    = {Advances in Computer Vision and Pattern Recognition},
  publisher = {Springer},
  year      = {2017}
}


@inproceedings{PADA_eccv18,
  author    = {Zhangjie Cao and
               Lijia Ma and
               Mingsheng Long and
               Jianmin Wang},
  title     = {Partial Adversarial Domain Adaptation},
  booktitle = {ECCV},
  year      = {2018}
}

@book{children_learning,
  editor    = {Jeffrey Bisanz and Gay L. Bisanz and Robert Kail},
  title     = {Learning in Children: Progress in Cognitive Development Research},
  publisher = {Springer-Verlag},
  year      = {1983}
}


@article{PLOS,
    author = {Ferguson, Brock AND Franconeri, Steven L. AND Waxman, Sandra R.},
    journal = {PLOS ONE},
    publisher = {Public Library of Science},
    title = {Very young infants learn abstract rules in the visual modality},
    year = {2018},
    month = {01},
    volume = {13},
    url = {https://doi.org/10.1371/journal.pone.0190185},
    pages = {1-14},
    number = {1},
    doi = {10.1371/journal.pone.0190185}
}


@inproceedings{venkateswara2017Deep,
	title={Deep Hashing Network for Unsupervised Domain Adaptation},
	author={Venkateswara, Hemanth and Eusebio, Jose and Chakraborty, Shayok and Panchanathan, Sethuraman},
	booktitle={CVPR},
	year={2017}
}


@INPROCEEDINGS{imagenet,
    author = {Jia Deng and Wei Dong and Richard Socher and Li-jia Li and Kai Li and Li Fei-fei},
    title = {Imagenet: A large-scale hierarchical image database},
    booktitle = {CVPR},
    year = {2009}
}

@techreport{caltech256,
Author = {G. Griffin and A. Holub and P. Perona},
Title = {Caltech-256 Object Category Dataset},
Institution = {California Institute of Technology},
Year = {2007},
URL = {http://authors.library.caltech.edu/7694},
Number = {7694}
}

@inproceedings{he2016deep,
  title={Deep residual learning for image recognition},
  author={He, Kaiming and Zhang, Xiangyu and Ren, Shaoqing and Sun, Jian},
  booktitle={CVPR},
  year={2016}
}


@article{goyal2017accurate,
  title={Accurate, large minibatch SGD: training imagenet in 1 hour},
  author={Goyal, Priya and Doll{\'a}r, Piotr and Girshick, Ross and Noordhuis, Pieter and Wesolowski, Lukasz and Kyrola, Aapo and Tulloch, Andrew and Jia, Yangqing and He, Kaiming},
  journal={arXiv preprint:1706.02677},
  year={2017}
}

@article{krizhevsky2014one,
  title={One weird trick for parallelizing convolutional neural networks},
  author={Krizhevsky, Alex},
  journal={arXiv preprint:1404.5997},
  year={2014}
}


@inproceedings{gidaris2018unsupervised,
  title={Unsupervised Representation Learning by Predicting Image Rotations},
  author={Spyros Gidaris and Praveer Singh and Nikos Komodakis},
  booktitle={ICLR},
  year={2018}
}

@inproceedings{zhou2016cvpr,
    author    = {Zhou, Bolei and Khosla, Aditya and Lapedriza, Agata and Oliva, Aude and Torralba, Antonio},
    title     = {Learning Deep Features for Discriminative Localization},
    booktitle = {CVPR},
    year      = {2016}
}

@article{Xu2019SelfsupervisedDA,
  title={Self-supervised Domain Adaptation for Computer Vision Tasks},
  author={Jiaolong Xu and Liang Xiao and Antonio M. L{\'o}pez},
  journal={ArXiv},
  year={2019},
  volume={abs/1907.10915}
}

@inproceedings{Bucci2019TacklingPD,
  title={Tackling Partial Domain Adaptation with Self-Supervision},
  author={Silvia Bucci and Antonio D'Innocente and Tatiana Tommasi},
  booktitle={ICIAP},
  year={2019}
}

@inproceedings{jigen,
  title={Domain Generalization by Solving Jigsaw Puzzles},
  author={Carlucci, Fabio M. and D'Innocente, Antonio and Bucci, Silvia and Caputo, Barbara and Tommasi, Tatiana},
  booktitle={CVPR},
  year={2019}
}

@article{hospedales19,
  title={Episodic Training for Domain Generalization},
  author={Li, Da and Zhang, Jianshu and Yang, Yongxin and Liu, Cong and Song, Yi-Zhe and Hospedales, Timothy M.},
  journal={arXiv preprint:1902.00113},
  year={2019}
}

@article{SSLsurvey,
  title={Self-supervised Visual Feature Learning with Deep Neural Networks: A Survey},
  author={Jing, Longlong  and Tian, Yingli},
  journal={arXiv preprint:1902.06162},
  year={2019}
}

@inproceedings{NIPS2014_geometric,
title = {Discriminative Unsupervised Feature Learning with Convolutional Neural Networks},
author = {Dosovitskiy, Alexey and Springenberg, Jost Tobias and Riedmiller, Martin and Brox, Thomas},
booktitle = {NIPS},
year = {2014}
}

@InProceedings{caron2018deep,
  title={Deep Clustering for Unsupervised Learning of Visual Features},
  author={Caron, Mathilde and Bojanowski, Piotr and Joulin, Armand and Douze, Matthijs},
  booktitle={ECCV},
  year={2018}
}

@inproceedings{pathakCVPR16context,
    Author = {Pathak, Deepak and
    Kr\"ahenb\"uhl, Philipp and
    Donahue, Jeff and
    Darrell, Trevor and
    Efros, Alexei},
    Title = {Context Encoders:
    Feature Learning by Inpainting},
    Booktitle = {CVPR},
    Year = {2016}
}

@InProceedings{ZSSR,
               author = {Assaf Shocher, Nadav Cohen, Michal Irani},
               title = {"Zero-Shot" Super-Resolution using Deep Internal Learning},
               booktitle = {CVPR},
               year = {2018}
              }
              
@inproceedings{ren-cvpr2018,
  title = {Cross-Domain Self-supervised Multi-task Feature Learning using Synthetic Imagery},
  author = {Ren, Zhongzheng and Lee, Yong Jae},
  booktitle = {CVPR},
  year = {2018}
}

@inproceedings{audiovisual,
  title={Audio-Visual Scene Analysis with Self-Supervised Multisensory Features},
  author={Owens, Andrew and  Efros,  Alexei A. },
  booktitle={ECCV},
  year={2018}
}


@InProceedings{grasp2vec,
  title = 	 {Grasp2Vec: Learning Object Representations from Self-Supervised Grasping},
  author = 	 {Jang, Eric and Devin, Coline and Vanhoucke, Vincent and Levine, Sergey},
  booktitle = 	 {CoRL},
  year = 	 {2018}
}


@inproceedings{visiontouch,
  author    = {Michelle A. Lee and  Yuke Zhu* and Krishnan Srinivasan and Parth Shah and Silvio Savarese and Li Fei-Fei and Animesh Garg and Jeannette Bohg},
  title     = {Making Sense of Vision and Touch: Self-Supervised Learning of Multimodal Representations for
Contact-Rich Tasks},
  booktitle   = {ICRA},
  year      = {2019}
}

@inproceedings{multitaskSSL,
  author    = {Carl Doersch and
               Andrew Zisserman},
  title     = {Multi-task Self-Supervised Visual Learning},
  booktitle = {ICCV},
  year      = {2017}
}

@inproceedings{SSLvideo,
title	= {Time-Contrastive Networks: Self-Supervised Learning from Video},
author	= {Pierre Sermanet and Corey Lynch and Yevgen Chebotar and Jasmine Hsu and Eric Jang and Stefan Schaal and Sergey Levine},
  booktitle   = {ICRA},
year	= {2018}
}

@inproceedings{Wang_UnsupICCV2015,
    Author = {Xiaolong Wang and Abhinav Gupta},
    Title = {Unsupervised Learning of Visual Representations using Videos},
    Booktitle = {ICCV},
    Year = {2015}
}


@@inproceedings{adagraph,
  title={Adagraph: Unifying predictive and continuous domain adaptation through graphs},
  author={Mancini, Massimiliano and Bulo, Samuel Rota and Caputo, Barbara and Ricci, Elisa},
  booktitle={CVPR},
  year={2019}
}


@inproceedings{dcoral,
  author={Baochen Sun and Kate Saenko},
  title={Deep CORAL: Correlation Alignment for Deep Domain Adaptation},
  booktitle={ECCV 2016 Workshops},
  year={2016}
}

@inproceedings{
  morerio2018minimalentropy,
  title={Minimal-Entropy Correlation Alignment for Unsupervised Deep Domain Adaptation},
  author={Morerio, Pietro and Cavazza, Jacopo and Murino, Vittorio},
  journal={ICLR},
  year={2018}
  }
  
@article{hdivergence,
title	= {A theory of learning from different domains},
author	= {Shai Ben-David and John Blitzer and Koby Crammer and Alex Kulesza and Fernando Pereira and Jennifer Vaughan},
year	= {2010},
journal	= {Machine Learning},
pages	= {151--175},
volume	= {79}
}

@article{saito2017maximum,
  title={Maximum Classifier Discrepancy for Unsupervised Domain Adaptation},
  author={Saito, Kuniaki and Watanabe, Kohei and Ushiku, Yoshitaka and Harada, Tatsuya},
  journal={CVPR},
  year={2018}
}

@INPROCEEDINGS{multivariatereg,
            author={Y. Yang and T. M. Hospedales},
            booktitle={CVPR},
            title={Multivariate Regression on the Grassmannian for Predicting Novel Domains},
            year={2016}
}

@article{ADAGE,
  title={Agnostic Domain Generalization},
  author={Fabio M. Carlucci and Paolo Russo and Tatiana Tommasi and Barbara Caputo},
  journal={arXiv preprint:1808.01102},
  year={2018}
}


@inproceedings{DLOW,
  author = {Rui Gong and  Wen Li and  Yuhua Chen and   Luc Van Gool},
  title = {DLOW: Domain Flow for Adaptation and Generalization},
  year = 2019,
  booktitle = {CVPR}
}


@article{CaruanaMTL,
 author = {Caruana, Rich},
 title = {Multitask Learning},
 journal = {Mach. Learn.},
 volume = {28},
 number = {1},
 year = {1997},
 pages = {41--75}
} 


@inproceedings{SimultaneousECCV14,
  author    = {Bharath Hariharan and
               Pablo Andr{\'{e}}s Arbel{\'{a}}ez and
               Ross B. Girshick and
               Jitendra Malik},
  title     = {Simultaneous Detection and Segmentation},
  booktitle = {ECCV},
  year      = {2014}
}


@inproceedings{FRCNN,
 author = {Girshick, Ross},
 title = {Fast R-CNN},
 booktitle = {ICCV},
 year = {2015}
} 


@InProceedings{Kokkinos_2017_CVPR,
author = {Kokkinos, Iasonas},
title = {Ubernet: Training a Universal Convolutional Neural Network for Low-, Mid-, and High-Level Vision Using Diverse Datasets and Limited Memory},
booktitle = {CVPR},
year = {2017}
}

@inproceedings{stitch,
  author    = {Ishan Misra and
               Abhinav Shrivastava and
               Abhinav Gupta and
               Martial Hebert},
  title     = {Cross-Stitch Networks for Multi-task Learning},
  booktitle = {CVPR},
  year      = {2016}
}

@inproceedings{AZ_SS,
  author    = {Carl Doersch and
               Andrew Zisserman},
  title     = {Multi-task Self-Supervised Visual Learning},
  booktitle = {ICCV},
  year      = {2017}
}

@inproceedings{fullyadaptive,
  author    = {Yongxi Lu and
               Abhishek Kumar and
               Shuangfei Zhai and
               Yu Cheng and
               Tara Javidi and
               Rog{\'{e}}rio Schmidt Feris},
  title     = {Fully-Adaptive Feature Sharing in Multi-Task Networks with Applications
               in Person Attribute Classification},
  booktitle = {CVPR},
  year      = {2017}
}

@inproceedings{kendall2017multi,
  title={Multi-Task Learning Using Uncertainty to Weigh Losses for Scene Geometry and Semantics},
  author={Kendall, Alex and Gal, Yarin and Cipolla, Roberto},
  booktitle={CVPR},
  year={2018}
}

@inproceedings{gradnorm,
  author    = {Zhao Chen and
               Vijay Badrinarayanan and
               Chen{-}Yu Lee and
               Andrew Rabinovich},
  title     = {GradNorm: Gradient Normalization for Adaptive Loss Balancing in Deep
               Multitask Networks},
  booktitle = {ICML},
  year      = {2018}
}

@InProceedings{Guo_2018_ECCV,
author = {Guo, Michelle and Haque, Albert and Huang, De-An and Yeung, Serena and Fei-Fei, Li},
title = {Dynamic Task Prioritization for Multitask Learning},
booktitle = {ECCV},
year = {2018}
} 

@article{LUPI,
  author    = {Vladimir Vapnik and
               Akshay Vashist},
  title     = {A new learning paradigm: Learning using privileged information},
  journal   = {Neural Networks},
  volume    = {22},
  number    = {5-6},
  pages     = {544--557},
  year      = {2009}
}

@incollection{NIPS2018ROCK,
title = {Revisiting Multi-Task Learning with ROCK: a Deep Residual Auxiliary Block for Visual Detection},
author = {Mordan, Taylor and THOME, Nicolas and Henaff, Gilles and Cord, Matthieu},
booktitle = {NIPS},
year = {2018}
}

@article{auxtasks,
  title={Auxiliary Tasks in Multi-task Learning},
  author={Lukas Liebel and Marco K{\"{o}}rner},
  journal={arXiv preprint:1805.06334},
  year={2018}
}

@inproceedings{aux1,
  author    = {Yabin Zhang and
               Hui Tang and
               Kui Jia},
  title     = {Fine-Grained Visual Categorization Using Meta-learning Optimization
               with Sample Selection of Auxiliary Data},
  booktitle = {ECCV},
  year      = {2018}
}

@inproceedings{aux2,
title	= {Unsupervised Learning of Depth and Ego-Motion from Video},
author	= {Tinghui Zhou and Matthew Brown and Noah Snavely and David Lowe},
year	= {2017},
booktitle	= {CVPR}
}

@article{aux3,
  title={Self-Supervised Generalisation with Meta Auxiliary Learning},
  author={Shikun Liu and Andrew J. Davison and Edward Johns},
  journal={arXiv preprint:1901.08933},
  year={2019}
}


@inproceedings{OquabTL,
 author = {Oquab, Maxime and Bottou, Leon and Laptev, Ivan and Sivic, Josef},
 title = {Learning and Transferring Mid-level Image Representations Using Convolutional Neural Networks},
 booktitle = {CVPR},
 year = {2014}
} 

@incollection{YosinskiNIPS2014,
title = {How transferable are features in deep neural networks?},
author = {Yosinski, Jason and Clune, Jeff and Bengio, Yoshua and Lipson, Hod},
booktitle = {NIPS},
year = {2014}
}

@inproceedings{FTmedical,
  author    = {Zongwei Zhou and
               Jae Y. Shin and
               Lei Zhang and
               Suryakanth R. Gurudu and
               Michael B. Gotway and
               Jianming Liang},
  title     = {Fine-Tuning Convolutional Neural Networks for Biomedical Image Analysis:
               Actively and Incrementally},
  booktitle = {CVPR},
  year      = {2017}
}

@inproceedings{SpotTune,
author    = {Yunhui Guo and Honghui Shi and Abhishek Kumar and Kristen Grauman and Tajana Rosing and Rogerio Feris},
title     = {SpotTune: Transfer Learning through Adaptive Fine-tuning},
booktitle = {CVPR},
year      = {2019}
}

@inproceedings{liICML18,
  TITLE = {{Explicit Inductive Bias for Transfer Learning with Convolutional Networks}},
  AUTHOR = {Li, Xuhong and Grandvalet, Yves and Davoine, Franck},
  BOOKTITLE = {ICML},
  YEAR = {2018}
}


@InProceedings{Yang_2015_CVPR,
author = {Yang, Linjie and Luo, Ping and Change Loy, Chen and Tang, Xiaoou},
title = {A Large-Scale Car Dataset for Fine-Grained Categorization and Verification},
booktitle = {CVPR},
year = {2015}
} 


@InProceedings{Ginosar_2015_ICCV_Workshops,
author = {Ginosar, Shiry and Rakelly, Kate and Sachs, Sarah and Yin, Brian and Efros, Alexei A.},
title = {A Century of Portraits: A Visual Historical Record of American High School Yearbooks},
booktitle = {ICCV Workshops},
year = {2015}
} 


@InProceedings{massi,
author = {Mancini, Massimiliano and Rota Bulò, Samuel and Caputo, Barbara, and Ricci, Elisa},
title = {AdaGraph: Unifying Predictive and Continuous Domain Adaptation through Graphs},
booktitle = {CVPR},
year = {2019}
} 


@InProceedings{Saito_2018_ECCV,
author = {Saito, Kuniaki and Yamamoto, Shohei and Ushiku, Yoshitaka and Harada, Tatsuya},
title = {Open Set Domain Adaptation by Backpropagation},
booktitle = {ECCV},
year = {2018}
} 


@inproceedings{semisup1,
author = {Yao, Ting and Pan, Yingwei and Ngo, Chong-Wah and Li, Houqiang and Mei, Tao},
year = {2015},
title = {Semi-supervised Domain Adaptation with Subspace Learning for visual recognition},
booktitle = {CVPR}
}

@inproceedings{semisup2,
author = { Jeff Donahue and Judy Hoffman and Erik Rodner and Kate Saenko and Trevor Darrell },
year = {2013},
title = {Semi-supervised Domain Adaptation with Instance Constraints},
booktitle = {CVPR}
}

@inproceedings{ijcai2018,
  title     = {Semi-Supervised Optimal Transport for Heterogeneous Domain Adaptation},
  author    = {Yuguang Yan and Wen Li and Hanrui Wu and Huaqing Min and Mingkui Tan and Qingyao Wu},
  booktitle = {IJCAI},
  year      = {2018}
}

@inproceedings{museumECCV18,
  author    = {Piotr Koniusz and
               Yusuf Tas and
               Hongguang Zhang and
               Mehrtash Tafazzoli Harandi and
               Fatih Porikli and
               Rui Zhang},
  title     = {Museum Exhibit Identification Challenge for the Supervised Domain
               Adaptation and Beyond},
  booktitle = {ECCV},
  year      = {2018}
}

@inproceedings{KulisSD11,
  author = {Kulis, Brian and Saenko, Kate and Darrell, Trevor},
  booktitle = {CVPR},
  title = {What you saw is not what you get: Domain adaptation using asymmetric kernel transforms},
  year = 2011
}

@incollection{NIPS2018_MDA1,
title = {Adversarial Multiple Source Domain Adaptation},
author = {Zhao, Han and Zhang, Shanghang and Wu, Guanhang and Moura, Jos\'{e} M. F. and Costeira, Joao P and Gordon, Geoffrey J},
booktitle = {NIPS},
year = {2018}
}

@inproceedings{NIPS2018_MDA2,
  author    = {Judy Hoffman and
               Mehryar Mohri and
               Ningshan Zhang},
  title     = {Algorithms and Theory for Multiple-Source Adaptation},
  booktitle = {NIPS},
  year      = {2018}
}

@inProceedings{mancini2018kitting,
	author = {Mancini, Massimilano and Karaoguz, Hakan and Ricci, Elisa and Jensfelt, Patric and Caputo, Barbara},
  	title  = {Kitting in the Wild through Online Domain Adaptation},
  	booktitle = {IROS},
  	year      = {2018}
}

@inproceedings{Hoffman_CVPR2014,
author={Judy Hoffman and Trevor Darrell and Kate Saenko},
title={Continuous Manifold Based Adaptation For Evolving Visual Domains},
booktitle={CVPR},
year={2014}
}

@inproceedings{Wulfmeier2017IncrementalAD,
  title={Incremental Adversarial Domain Adaptation for Continually Changing Environments},
  author={Markus Wulfmeier and Alex Bewley and Ingmar Posner},
  journal={ICRA},
  year={2018}
}

@inproceedings{fewshotNIPS17,
title = {Few-Shot Adversarial Domain Adaptation},
author = {Motiian, Saeid and Jones, Quinn and Iranmanesh, Seyed and Doretto, Gianfranco},
booktitle = {NeurIPS},
year = {2017}
}

@incollection{oneshotNIPS2018,
title = {One-Shot Unsupervised Cross Domain Translation},
author = {Benaim, Sagie and Wolf, Lior},
booktitle = {NeurIPS},
year = {2018}
}

@InProceedings{Cohen_2019_ICCV,
author = {Cohen, Tomer and Wolf, Lior},
title = {Bidirectional One-Shot Unsupervised Domain Mapping},
booktitle = {ICCV},
year = {2019}
} 

@inproceedings{asano20a-critical,
 author = {Yuki M. Asano and Christian Rupprecht and Andrea Vedaldi},
 booktitle = {ICLR},
 title = {A critical analysis of self-supervision, or what we can learn from a single image},
 year = {2020}
}

@inproceedings{liu2018receptive,
  title={Receptive field block net for accurate and fast object detection},
  author={Liu, Songtao and Huang, Di and others},
  booktitle={Proceedings of the European Conference on Computer Vision (ECCV)},
  pages={385--400},
  year={2018}
}

@inproceedings{zhang2018single,
  title={Single-shot refinement neural network for object detection},
  author={Zhang, Shifeng and Wen, Longyin and Bian, Xiao and Lei, Zhen and Li, Stan Z},
  booktitle={Proceedings of the IEEE conference on computer vision and pattern recognition},
  pages={4203--4212},
  year={2018}
}

@inproceedings{dai2016r,
  title={R-fcn: Object detection via region-based fully convolutional networks},
  author={Dai, Jifeng and Li, Yi and He, Kaiming and Sun, Jian},
  booktitle={Advances in neural information processing systems},
  pages={379--387},
  year={2016}
}


@inproceedings{dalal2005histograms,
  title={Histograms of oriented gradients for human detection},
  author={Dalal, Navneet and Triggs, Bill},
  booktitle={2005 IEEE computer society conference on computer vision and pattern recognition (CVPR'05)},
  volume={1},
  pages={886--893},
  year={2005},
  organization={IEEE}
}

@inproceedings{viola2001rapid,
  title={Rapid object detection using a boosted cascade of simple features},
  author={Viola, Paul and Jones, Michael},
  booktitle={Proceedings of the 2001 IEEE computer society conference on computer vision and pattern recognition. CVPR 2001},
  volume={1},
  pages={I--I},
  year={2001},
  organization={IEEE}
}

@InProceedings{Zou_2018_ECCV,
author = {Zou, Yang and Yu, Zhiding and Vijaya Kumar, B.V.K. and Wang, Jinsong},
title = {Unsupervised Domain Adaptation for Semantic Segmentation via Class-Balanced Self-Training},
booktitle = {The European Conference on Computer Vision (ECCV)},
month = {September},
year = {2018}
}

@InProceedings{gradcam_2017_ICCV,
author = {Selvaraju, Ramprasaath R. and Cogswell, Michael and Das, Abhishek and Vedantam, Ramakrishna and Parikh, Devi and Batra, Dhruv},
title = {Grad-CAM: Visual Explanations From Deep Networks via Gradient-Based Localization},
booktitle = {ICCV},
year = {2017}
} 
