# Supplementary material
Source: ML conference proceedings conference paper supplement (https://www.ecva.net/papers/eccv_2020/papers_ECCV/html/123610715_ECCV_2020_paper.php)
Supplement: Supplementary file 11 [file 123610715-supp.zip › 2621-supp/full_tables.tex]

\section{Full target results}
\input{tables/voc2amd}
\input{tables/city2foggy}
%\subsubsection{Results of Cross-Domain methods using full target set}
For completeness with respect to the main submission, we extend the original results on VOC $\rightarrow$ AMD in Table \ref{table:VOC2AMD} and Cityscapes $\rightarrow$ FoggyCityscapes in Table \ref{table:C2F}, reporting the full target results of DivMatch \cite{diversify&match_Kim_2019_CVPR} and SW \cite{Saito_2019_CVPR}. Since we are granting to those methods the access to a much larger set of data with respect to OSHOT, the reported results can be only considered as an empirical upper-bound. We highlight that OSHOT outperforms SW also in this Full Target case, while remaining lower than DivMatch.

\section{Pseudo-labeling}
\input{tables/pseudo}

The role of rotation recognition on the whole image for classification across domains was extensively discussed in \cite{Xu2019SelfsupervisedDA}. The na\"ive application of this approach would not lead to any advantage in detection: we deal with scenes and the standard position of sky and ground would steer the recognition, not providing useful information. \our uses rotation recognition by focusing explicitly on objects. We consider cropped portions of the image features map to take advantage of the adaptive power of rotation recognition on local information. Indeed, as discussed in \cite{Saito_2019_CVPR}, local domain alignment is crucial for cross-domain detection. 

Although \cite{inoue2018cross,robust_Khodabandeh_2019_ICCV,kim2019selftraining} indicate that pseudo-labeling is a viable option for detection across domains, this approach has some well-known issues, \eg misclassified outputs with high confidence need to be discarded \cite{kim2019selftraining}. \our is based on a new form of cross-task pseudo-labeling that avoids those issues: the pseudo-labels produced by the source models are used for the self-supervised rotation classifier. In this way we keep the advantage of model initialization through pseudo-labeling with a reduced risk of error propagation. To provide a practical example: using standard pseudo-labeling (SPS) on VOC $\rightarrow$ AMD we get the results in the top part of Table \ref{table:pseudo}, where the negative effect of SPS is clearly visible.

\section{Self-Supervision}
%\subsubsection{Jigsaw vs Rotation}
For the auxiliary self-supervised task we set the loss weight $\lambda = 0.05$ in the pretraining stage and increase it to $\lambda = 0.2$ for adaptation. This choice has the same effect as increasing the learning rate during adaptation and helps to speed up the inference stage. Using a lower weight for $\lambda$ would require more finetuning iterations, as shown in the middle part of Table \ref{table:pseudo}.

Besides rotation recognition it is also possible to use other self-supervised tasks for the \our algorithm. In the last two rows of Table \ref{table:pseudo}, we evaluate also the suitability of self-supervised jigsaw puzzle \cite{noroozi2016unsupervised}. The obtained results confirm the effectiveness of our method.
