# Supplementary material
Source: ML conference proceedings conference paper supplement (https://www.ecva.net/papers/eccv_2020/papers_ECCV/html/123610715_ECCV_2020_paper.php)
Supplement: Supplementary file 11 [file 123610715-supp.zip › 2621-supp/main.bbl]

\begin{thebibliography}{1}
\providecommand{\url}[1]{\texttt{#1}}
\providecommand{\urlprefix}{URL }
\providecommand{\doi}[1]{https://doi.org/#1}

\bibitem{hoiem2012diagnosing}
Hoiem, D., Chodpathumwan, Y., Dai, Q.: Diagnosing error in object detectors.
  In: ECCV (2012)

\bibitem{inoue2018cross}
Inoue, N., Furuta, R., Yamasaki, T., Aizawa, K.: Cross-domain weakly-supervised
  object detection through progressive domain adaptation. In: CVPR (2018)

\bibitem{robust_Khodabandeh_2019_ICCV}
Khodabandeh, M., Vahdat, A., Ranjbar, M., Macready, W.G.: A robust learning
  approach to domain adaptive object detection. In: ICCV (2019)

\bibitem{kim2019selftraining}
Kim, S., Choi, J., Kim, T., Kim, C.: Self-training and adversarial background
  regularization for unsupervised domain adaptive one-stage object detection.
  In: ICCV (2019)

\bibitem{diversify&match_Kim_2019_CVPR}
Kim, T., Jeong, M., Kim, S., Choi, S., Kim, C.: Diversify and match: A domain
  adaptive representation learning paradigm for object detection. In: CVPR
  (2019)

\bibitem{noroozi2016unsupervised}
Noroozi, M., Favaro, P.: Unsupervised learning of visual representations by
  solving jigsaw puzzles. In: ECCV (2016)

\bibitem{Saito_2019_CVPR}
Saito, K., Ushiku, Y., Harada, T., Saenko, K.: Strong-weak distribution
  alignment for adaptive object detection. In: CVPR (2019)

\bibitem{gradcam_2017_ICCV}
Selvaraju, R.R., Cogswell, M., Das, A., Vedantam, R., Parikh, D., Batra, D.:
  Grad-cam: Visual explanations from deep networks via gradient-based
  localization. In: ICCV (2017)

\bibitem{Xu2019SelfsupervisedDA}
Xu, J., Xiao, L., L{\'o}pez, A.M.: Self-supervised domain adaptation for
  computer vision tasks. ArXiv  \textbf{abs/1907.10915} (2019)

\end{thebibliography}
