# Supplementary material
Source: ML conference proceedings conference paper supplement (https://www.ecva.net/papers/eccv_2020/papers_ECCV/html/123610715_ECCV_2020_paper.php)
Supplement: Supplementary file 11 [file 123610715-supp.zip › 2621-supp/main.tex]

% updated April 2002 by Antje Endemann
% Based on CVPR 07 and LNCS, with modifications by DAF, AZ and elle, 2008 and AA, 2010, and CC, 2011; TT, 2014; AAS, 2016; AAS, 2020

\documentclass[runningheads]{llncs}
\usepackage{graphicx}
\usepackage{comment}
\usepackage{amsmath,amssymb} % define this before the line numbering.
\usepackage{color}


%%%%%%%%%%%%%%%%%%%%%%%%%%ADDED%%%%%%%%%%%%%%%%%%%%%%%%%%%%


\newcommand*{\our}{OSHOT\@\xspace}

\usepackage{booktabs}
\usepackage{multirow}
\usepackage{hhline}
\usepackage{xspace}
\makeatletter
\DeclareRobustCommand\onedot{\futurelet\@let@token\@onedot}
\def\@onedot{\ifx\@let@token.\else.\null\fi\xspace}
\def\eg{\emph{e.g}\onedot} \def\Eg{\emph{E.g}\onedot}
\def\ie{\emph{i.e}\onedot} \def\Ie{\emph{I.e}\onedot}
\def\cf{\emph{c.f}\onedot} \def\Cf{\emph{C.f}\onedot}
\def\etc{\emph{etc}\onedot} \def\vs{\emph{vs}\onedot}
\def\wrt{w.r.t\onedot} \def\dof{d.o.f\onedot}
\def\etal{\emph{et al}\onedot}
\makeatother

\usepackage{epsfig}
\usepackage{graphicx}
\graphicspath{{./images/}}
\usepackage{overpic}
\usepackage{float}
\floatstyle{plaintop}
\restylefloat{table}
\usepackage[export]{adjustbox}
\usepackage{multirow}
\usepackage{subfig}
\usepackage{amsmath}
\DeclareMathOperator*{\argmin}{argmin}
\usepackage[ruled,vlined]{algorithm2e}
\usepackage[titletoc]{appendix}
\usepackage{hyperref}

%%%%%%%%%%%%%%%%%%%%%%%%%%%%%%%%%%%%%%%%%%%%%%%%%%%%%%%%%%%

\usepackage[font=small,labelfont=bf,labelsep=period]{caption}
\DeclareCaptionLabelFormat{andtable}{#1~#2  \&  \tablename~\thetable}


\begin{document}
\pagestyle{headings}
\mainmatter
\def\ECCVSubNumber{}  

\title{One-Shot Unsupervised Cross-Domain Detection Supplementary Material} % Replace with your title

% CAMERA READY SUBMISSION
%\begin{comment}
\titlerunning{One-Shot Unsupervised Cross-Domain Detection Supplementary Material}
% If the paper title is too long for the running head, you can set
% an abbreviated paper title here
%
\author{Antonio D'Innocente\inst{1,3} \and
Francesco Cappio~Borlino\inst{2} \and
Silvia Bucci\inst{2,3} \and \\ 
Barbara Caputo\inst{2,3} \and
Tatiana Tommasi\inst{2,3}
}
%
\authorrunning{A. D'Innocente et al.}
% First names are abbreviated in the running head.
% If there are more than two authors, 'et al.' is used.
%
\institute{Sapienza University of Rome, Rome, Italy \email{dinnocente@diag.uniroma1.it} \and
Politecnico di Torino, Turin, Italy \email{\{francesco.cappio,silvia.bucci,barbara.caputo,tatiana.tommasi\}@polito.it} \and
Italian Institute of Technology, Turin, Italy}
%\end{comment}
%*********We make the code of our project available at \url{https://github.com/VeloDC/oshot_detection}.

%*********
\maketitle

\input{full_tables}
\input{ablation_appendix}
\input{qualitative_appendix}
\input{pseudo_appendix}

\clearpage
%\clearpage
\bibliographystyle{splncs04}
\bibliography{egbib}


\end{document}
