# Supplementary material
Source: ML conference proceedings conference paper supplement (https://www.ecva.net/papers/eccv_2020/papers_ECCV/html/123610715_ECCV_2020_paper.php)
Supplement: Supplementary file 11 [file 123610715-supp.zip › 2621-supp/pseudo_appendix.tex]

\section{\our pseudocode}
The pseudocode 
for the adaptive phase of \our is presented in Algorithm \ref{alg:os}. Here, $G_{f}$ and $G_{d}$ indicate the backbone feature extractor and detector, respectively parametrized by $\theta_{f}$ and $\theta_{d}$. $FC$ is the fully connected layer of the rotation classifier, parametrized by $\theta_{r}$, and $R$ is the rotator operator $R(x,\alpha)$ where $\alpha$, which indicates one random rotation to apply on $x$, is dropped for simplicity. The $pseudoboxcrop(\cdot|b)$ operator applies cropping and ROI pooling on the input feature map based on the corresponding location of pseudo-boxes $b$. 
