# Supplementary material
Source: ML conference proceedings conference paper supplement (https://www.ecva.net/papers/eccv_2020/papers_ECCV/html/123610715_ECCV_2020_paper.php)
Supplement: Supplementary file 11 [file 123610715-supp.zip › 2621-supp/qualitative_appendix.tex]

\begin{figure}[h!]
    \centering
    \includegraphics[width=0.73\textwidth]{images/gradcam_box-crop.pdf}
    \caption{Visualization of the most relevant image regions produced by Grad-CAM when classifying the correct rotation with $G_r(image)$ and $G_r(boxcrop)$}
    \label{fig:qualitative1}
\end{figure}
\begin{figure}[tb]
    \centering
    \includegraphics[width=\textwidth]{images/qualitative-crop.pdf}
    \caption{Qualitative visualization of detections with DivMatch, SW and \our on Comic (first row), Foggy Cityscapes (second row), Watercolor (third row), Social Bikes (fourth and fifth rows) and KITTI (sixth row). Numbers associated with bounding boxes indicate the detector's confidence}
    \label{fig:qualitative2}
\end{figure}
\section{Qualitative Analysis}
\subsubsection{Image vs Box rotation}
To validate our choice of considering box rotation over image rotation we set up a dedicated experiment. We ran the pretraining stage of \our on VOC by using either $G_r(image)$ or $G_r(boxcrop)$.
Then we tested the rotation classifier on whole images from the Clipart domain. In Figure \ref{fig:qualitative1} we show the results obtained with Grad-CAM \cite{gradcam_2017_ICCV} for the two cases, with heatmap indicating the most relevant regions responsible for recognizing the correct orientation. The Grad-CAM maps refer to the last output of the backbone feature extractor. We can see that, when the rotation classifier is trained on whole \textit{images} it learns to focus on the background (\eg the sky and the ground) in order to solve the task. On the contrary, when the \textit{boxcrop} operation is implemented to train the rotation classifier only on the relevant objects, it learns to look at objects' features even when it faces an entire image.

\subsubsection{Detection results of \our: baselines and self-supervised iterations}
Figure \ref{fig:qualitative2} shows some examples of detections of \our on images extracted from all the datasets considered in our work. We present as reference also the ground truth results as well as the predictions produced by DivMatch \cite{diversify&match_Kim_2019_CVPR} and SW \cite{Saito_2019_CVPR} that appear less precise than \our.
\begin{algorithm}[h!]
\label{alg:finetuning}
\SetAlgoLined
\KwData{$G_{f}$, $G_{d}$, $FC$, parameters $\theta_{f}$, $\theta_{r}$, $\theta_{d}$, rotator $R$, target image $x^{t}$}
$\theta_{f}^{*} \leftarrow \theta_{f}$ \\ 
$\theta_{r}^{*} \leftarrow \theta_{r}$ \\
 \While{still $\gamma$ iterations}{
  $b^{t},c^{t}$ $\leftarrow$ $G_{d}(G_{f}(x^{t}|\theta_{f}^{*})|\theta_{d})$\\
  $x_{r}^{t}$ $\leftarrow$ $R(x^{t})$\\
  $b_{r}^{t}$ $\leftarrow$ $R(b^{t})$\\
  minimize self-supervised loss $\mathcal{L}_{r}(FC_{\theta_{r}^{*}}(pseudoboxcrop(G_{f}(x_{r}^{t}|\theta_{f}^{*})|b_{r}^{t}))$\\
  update $\theta_{f}^{*}, \theta_{r}^{*}$ \\
 }
 predict label of test sample using $\mathcal{G}_{f}(\cdot|\theta_{f}^{*}), \mathcal{G}_{d}$
 \caption{\textbf{Adaptive phase of \our}}
 \label{alg:os}
\end{algorithm}
