# Supplementary material
Source: ML conference proceedings conference paper supplement (https://www.ecva.net/papers/eccv_2020/papers_ECCV/html/123610715_ECCV_2020_paper.php)
Supplement: Supplementary file 11 [file 123610715-supp.zip › 2621-supp/tables/city2foggy.tex]

\begin{table*}[tb]
\centering
\begin{adjustbox}{width=0.7\textwidth}
\centering
\begin{tabular}{c@{~~}c@{~~}c@{~~}c@{~~}c@{~~}c@{~~}c@{~~}c@{~~}c@{~~}|c@{~~}}
\hline
\multicolumn{10}{c}{\textsl{\textbf{One-Shot} Target}}\\
\hline
Method & person & rider & car & truck & bus & train & mcycle & bicycle & mAP\\ \hline
\multicolumn{10}{c}{\textbf{Source Only}}\\
\hline
FRCNN & 30.4 & 36.3 & 41.4 & 18.5  & 32.8 & 9.1 & 20.3 & 25.9 & 26.8 \\ \hline
\textbf{\textit{\our}} ($\gamma = 0$) & 31.8 & 42.0 & 42.6 & 20.1 & 31.6 & 10.6 & 24.8 & 30.7 & 29.3 \\
\textbf{\textit{\our}} ($\gamma = 10$) & 31.9 & 41.9 & 43.0 & 19.7 & 38.0 & 10.4 & 25.5 & 30.2 & 30.1\\
\textbf{\textit{\our}} ($\gamma = 30$) & 32.1 & 46.1 & 43.1 & 20.4 & 39.8 & 15.9 & 27.1 & 32.4 & \textbf{31.9}\\ \hline\hline
\multicolumn{10}{c}{\textsl{\textbf{Ten-Shot} Target}}\\
\hline
DivMatch  \cite{diversify&match_Kim_2019_CVPR} & 27.6 & 38.1 & 42.9 & 17.1 & 27.6 & 14.3 & 14.6 & 32.8 & 26.9 \\
SW \cite{Saito_2019_CVPR}  & 25.5 & 30.8 & 40.4 & 21.1 & 26.1 & 34.5 & 6.1 & 13.4 & 24.7 \\\hline \hline
\multicolumn{10}{c}{\textsl{\textbf{Full} Target}}\\
\hline
DivMatch  \cite{diversify&match_Kim_2019_CVPR} & 32.3 & 43.5 & 47.6 & 23.9 & 38.0 & 23.1 & 27.6 & 37.2 & 34.2 \\
SW \cite{Saito_2019_CVPR}  & 31.3 & 32.1 & 47.4 & 19.6 & 28.8 & 41.0 & 9.8 & 20.1 & 28.8 \\ \hline
\end{tabular}
\end{adjustbox}
%\vspace{2mm}
\caption{mAP results for Cityscapes $\rightarrow$ FoggyCityscapes}
\label{table:C2F}%\vspace{-3mm}
\end{table*}
