# Supplementary material
Source: ML conference proceedings conference paper supplement (https://www.ecva.net/papers/eccv_2020/papers_ECCV/html/123610715_ECCV_2020_paper.php)
Supplement: Supplementary file 11 [file 123610715-supp.zip › 2621-supp/tables/lambda.tex]

\begin{table*}[tb]
\centering
\begin{adjustbox}{width=0.5\textwidth}
\centering
\begin{tabular}{c@{~~}|c@{~~}}
\hline
Method & AMDs mAP Avg\\ \hline
\textbf{\textit{\our}} ($\gamma = 30$, $\lambda = 0.05$) & 36.0 \\ 
\textbf{\textit{\our}} ($\gamma = 70$, $\lambda = 0.05$) & 36.6 \\
\textbf{\textit{\our}} ($\gamma = 30$, $\lambda = 0.2$) & 37.6 \\ \hline
\end{tabular}
\end{adjustbox}
\caption{Lambda}
\label{table:lambda}
\end{table*}
