# Supplementary material
Source: ML conference proceedings conference paper supplement (https://www.ecva.net/papers/eccv_2020/papers_ECCV/html/123610715_ECCV_2020_paper.php)
Supplement: Supplementary file 11 [file 123610715-supp.zip › 2621-supp/tables/pseudo.tex]

\begin{table*}[tb]
\centering
\begin{adjustbox}{width=0.7\textwidth}
\centering
\begin{tabular}{c@{~~}c@{~~}c@{~~}c@{~~}|c@{~~}}
\hline
Method & Clipart & Comic & Watercolor & Avg\\ \hline
FRCNN & 26.4 & 18.1 & 42.8 & 29.1 \\ \hline
\textbf{\textit{\our}} ($\gamma = 30$) & 33.9 & 26.9 & 52.0 & 37.6 \\ \hline
\multicolumn{5}{c}{\textsl{Standard Pseudo-labeling}}\\ \hline
\textbf{\textit{\our}} SPS ($\gamma = 10$) & 17.4 & 14.0 & 21.7 & 17.7 \\
\textbf{\textit{\our}} SPS ($\gamma = 30$) & 6.7 & 5.3 & 12.1 & 6.0 \\ 
\hline
\multicolumn{5}{c}{\textsl{Self-Supervised Weight and Iterations}}\\ \hline
\textbf{\textit{\our}} ($\gamma = 30$, $\lambda = 0.05$) & 33.8 & 23.4 & 50.7 & 36.0 \\ 
\textbf{\textit{\our}} ($\gamma = 70$, $\lambda = 0.05$) & 34.1 & 24.5& 51.2 & 36.6 \\
\textbf{\textit{\our}} ($\gamma = 30$, $\lambda = 0.2$)  &33.9 & 26.9 & 52.0 & 37.6 \\ \hline
\multicolumn{5}{c}{\textsl{Self-Supervised Jigsaw Task}}\\ \hline
\textbf{\textit{\our}} Jigsaw ($\gamma = 0$) & 29.0 & 18.9 & 42.8 & 30.2\\
\textbf{\textit{\our}} Jigsaw ($\gamma = 30$) & 27.1 & 16.0 & 40.5 & 27.9\\
\hline
\end{tabular}
\end{adjustbox}
\caption{Analysis on pseudo-labeling and self-supervised tasks}
\label{table:pseudo}
\end{table*}
