# Supplementary material
Source: ML conference proceedings conference paper supplement (https://www.ecva.net/papers/eccv_2020/papers_ECCV/html/123610715_ECCV_2020_paper.php)
Supplement: Supplementary file 11 [file 123610715-supp.zip › 2621-supp/tables/voc2amd.tex]

\begin{table*}[tb]
\centering
\begin{adjustbox}{width=1\textwidth}
\subfloat[VOC $\rightarrow$ Clipart]{{}\begin{tabular}{c@{~~}c@{~~}c@{~~}c@{~~}c@{~~}c@{~~}c@{~~}c@{~~}c@{~~}c@{~~}c@{~~}c@{~~}c@{~~}c@{~~}c@{~~}c@{~~}c@{~~}c@{~~}c@{~~}c@{~~}c@{~~}|c@{~~}}
\hline%\hline
\multicolumn{22}{c}{\textsl{\textbf{One-Shot} Target}}\\
%\hline
\hline
Method & aero & bike & bird & boat & bottle & bus & car & cat & chair & cow & table & dog & horse & mbike & person & plant & sheep & sofa & train & tv & mAP\\ \hline
\multicolumn{22}{c}{\textbf{Source Only}}\\
\hline
FRCNN & 18.5 & 43.3 & 20.4 & 13.3 & 21.0 & 47.8 & 29.0 & 16.9 & 28.8 & 12.5 & 19.5 & 17.1 & 23.8 & 40.6 & 34.9 & 34.7 & 9.1 & 18.3 & 40.2 & 38.0 & 26.4 \\ \hline
\textbf{\textit{\our}} ($\gamma = 0$) & 23.1 & 55.3 & 22.7 & 21.4 & 26.8 & 53.3 & 28.9 & 4.6 & 31.4 & 9.2 & 27.8 & 9.6 & 30.9 & 47.0 & 38.2 & 35.2 & 11.1 & 20.4 & 36.0 & 33.6 & 28.3 \\
\textbf{\textit{\our}} ($\gamma = 10$) & 25.4 & 61.6 & 23.8 & 21.1 & 31.3 & 55.1 & 31.6 & 5.3 & 34.0 & 10.1 & 28.8 & 7.3 & 33.1 & 59.9 & 44.2 & 38.8 & 15.9 & 19.1 & 39.5 & 33.9 & 31.0\\
\textbf{\textit{\our}} ($\gamma = 30$) & 25.4 & 56.0 & 24.7 & 25.3 & 36.7 & 58.0 & 34.4 & 5.9 & 34.9 & 10.3 & 29.2 & 11.8 & 46.9 & 70.9 & 52.9 & 41.5 & 21.1 & 21.0 & 38.5 & 31.8 & \textbf{33.9}\\ \hline\hline
\multicolumn{22}{c}{\textsl{\textbf{Ten-Shot} Target}}\\
\hline
DivMatch  \cite{diversify&match_Kim_2019_CVPR} & 19.5 & 57.2 & 17.0 & 23.8 & 14.4 & 25.4 & 29.4 & 2.7 & 35.0 & 8.4 & 22.9 & 14.2 & 30.0 & 55.6 & 50.8 & 30.2 & 1.9 & 12.3 & 37.8 & 37.2 & 26.3 \\ 
SW \cite{Saito_2019_CVPR} & 21.5 & 39.9 & 21.7 & 20.5 & 32.7 & 34.1 & 25.1 & 8.5 & 33.2 & 10.9 & 15.2 & 3.4 & 32.2 & 56.9 & 46.5 & 35.4 & 14.7 & 15.2 & 29.2 & 32.0 & 26.4 \\ \hline
\hline
\multicolumn{22}{c}{\textsl{\textbf{Full} Target}}\\
\hline
DivMatch  \cite{diversify&match_Kim_2019_CVPR} & 26.6 & 66.7 & 26.7 & 33.9 & 42.4 & 35.4 & 40.7 & 12.0 & 45.9 & 51.6 & 23.5 & 15.5 & 49.1 & 71.6 & 64.0 & 45.3 & 20.4 & 36.6 & 45.3 & 41.3 & 39.7 \\ 
SW \cite{Saito_2019_CVPR}  & 15.5 & 37.1 & 22.9 & 22.1 & 32.6 & 44.6 & 28.1 & 10.1 & 34.6 & 9.8 & 19.2 & 11.5 & 36.5 & 56.9 & 57.1 & 37.4 & 12.3 & 9.6 & 33.2 & 34.2 & 28.3\\\hline
\end{tabular}}
\end{adjustbox}
\begin{adjustbox}{width=1\textwidth}
\subfloat[VOC $\rightarrow$ Comic]{\begin{tabular}{c@{~~}c@{~~}c@{~~}c@{~~}c@{~~}c@{~~}c@{~~}|c@{~~}}
\hline%\hline
\multicolumn{8}{c}{\textsl{\textbf{One-Shot} Target}}\\
\hline
Method & bike & bird & car & cat & dog & person &  mAP\\ \hline
FRCNN & 25.2 & 10.0 & 21.1 & 14.1 & 11.0 & 27.1 & 18.1 \\ \hline
\textbf{\textit{\our}} ($\gamma = 0$) & 26.9 & 11.6 & 22.7 & 9.1 & 14.2 & 28.3 & 18.8 \\
\textbf{\textit{\our}} ($\gamma = 10$) & 35.5 & 11.7 & 25.1 & 9.1 & 15.8 & 34.5 & 22.0 \\
\textbf{\textit{\our}} ($\gamma = 30$) & 35.2 & 14.4 & 30.0 & 14.8 & 20.0 & 46.7 & \textbf{26.9} \\  \hline\hline
\multicolumn{8}{c}{\textsl{\textbf{Ten-Shot} Target}}\\
\hline
DivMatch  \cite{diversify&match_Kim_2019_CVPR} & 27.1 & 12.3 & 26.2 & 11.5 & 13.8 & 34.0 & 20.8 \\ 
SW \cite{Saito_2019_CVPR} & 21.2 & 14.8 & 18.7 & 12.4 & 14.9 & 43.9 & 21.0 \\ \hline
\hline
\multicolumn{8}{c}{\textsl{\textbf{Full} Target}}\\
\hline
DivMatch  \cite{diversify&match_Kim_2019_CVPR} & 59.3 & 20.5 & 35.5 & 21.0 & 30.6 & 54.6 & 36.9 \\ 
SW \cite{Saito_2019_CVPR}  & 39.9 & 16.2 & 23.0 & 11.5 & 13.5 & 44.5 & 24.8 \\\hline
\end{tabular}} \hspace{0.5cm}
\subfloat[VOC $\rightarrow$ Watercolor]{\begin{tabular}{c@{~~}c@{~~}c@{~~}c@{~~}c@{~~}c@{~~}c@{~~}|c@{~~}}
\hline%\hline
\multicolumn{8}{c}{\textsl{\textbf{One-Shot} Target}}\\
\hline
Method & bike & bird & car & cat & dog & person &  mAP\\ \hline
FRCNN & 62.5 & 39.7 & 43.4 & 31.9 & 26.7 & 52.4 & 42.8 \\ \hline
\textbf{\textit{\our}} ($\gamma = 0$) & 70.2 & 46.7 & 45.5 & 31.2 & 27.2 & 55.7 & 46.1\\
\textbf{\textit{\our}} ($\gamma = 10$) & 70.2 & 46.7 & 48.1 & 30.9 & 32.3 & 59.9 & 48.0\\
\textbf{\textit{\our}} ($\gamma = 30$) & 77.1 & 44.7 & 52.4 & 37.3 & 37.0 & 63.3 & \textbf{52.0}\\ \hline\hline
\multicolumn{8}{c}{\textsl{\textbf{Ten-Shot} Target}}\\
\hline
DivMatch  \cite{diversify&match_Kim_2019_CVPR} & 64.6 & 44.1 & 44.6 & 34.1 & 24.9 & 60.0 & 45.4 \\
SW \cite{Saito_2019_CVPR}  & 66.3 & 41.1 & 41.1 & 30.5 & 20.5 & 52.3 & 42.0 \\
\hline
\hline
\multicolumn{8}{c}{\textsl{\textbf{Full} Target}}\\
\hline
DivMatch  \cite{diversify&match_Kim_2019_CVPR} & 86.6 & 50.5 & 50.9 & 36.2 & 39.5 & 64.5 & 54.7 \\ 
SW \cite{Saito_2019_CVPR}  & 65.7 & 45.1 & 43.1 & 32.4 & 30.5 & 56.2 & 45.5 \\ \hline
\end{tabular}}
\end{adjustbox}
%\vspace{-4mm}
\caption{mAP results for VOC $\rightarrow$ AMD}
\label{table:VOC2AMD}
\end{table*}
