# Supplementary material
Source: ML conference proceedings conference paper supplement (https://www.ecva.net/papers/eccv_2020/papers_ECCV/html/123610715_ECCV_2020_paper.php)

FRCNN

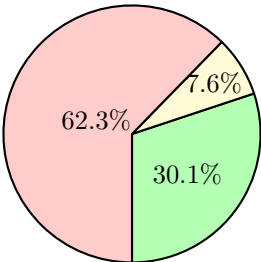OSHOT ( $\gamma = 0$ )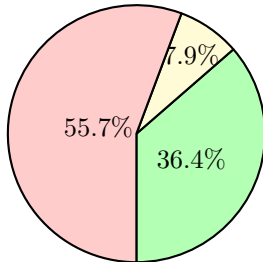OSHOT ( $\gamma = 30$ )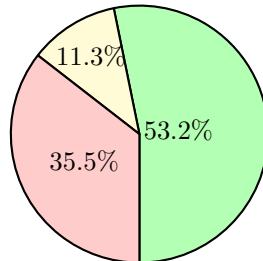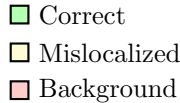

Supplement: Supplementary file 2 [file 123610715-supp.zip]

FRCNN

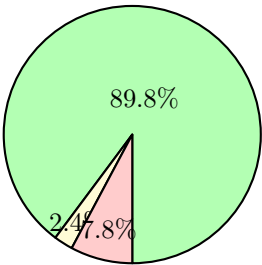OSHOT ( $\gamma = 0$ )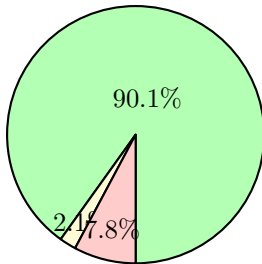OSHOT ( $\gamma = 30$ )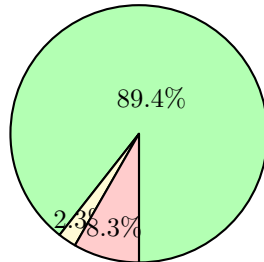

- Correct
- Mislocalized
- Background

Supplement: Supplementary file 3 [file 123610715-supp.zip]

FRCNN

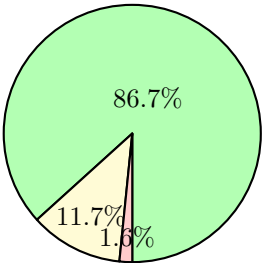OSHOT ( $\gamma = 0$ )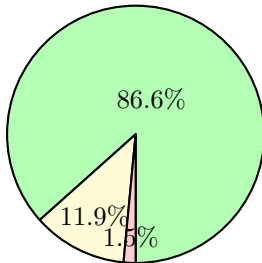OSHOT ( $\gamma = 30$ )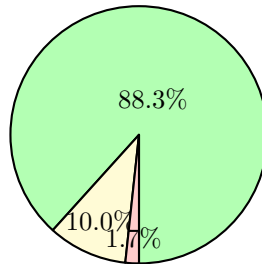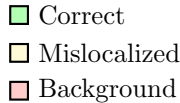

Supplement: Supplementary file 5 [file 123610715-supp.zip]

FRCNN

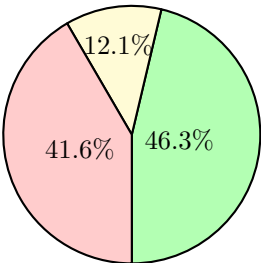OSHOT ( $\gamma = 0$ )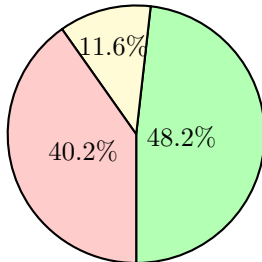OSHOT ( $\gamma = 30$ )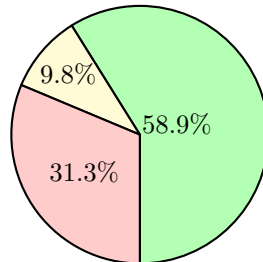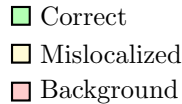

Supplement: Supplementary file 6 [file 123610715-supp.zip]

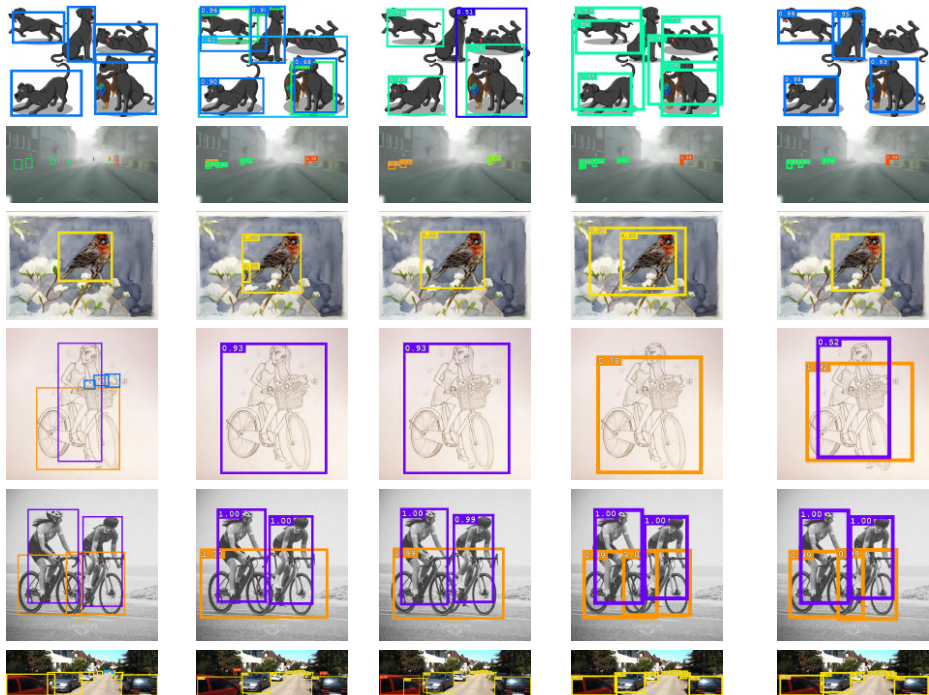

Ground Truth

DivMatch

SW

OSHOT  $\gamma = 0$

OSHOT  $\gamma = 30$

Supplement: Supplementary file 7 [file 123610715-supp.zip]

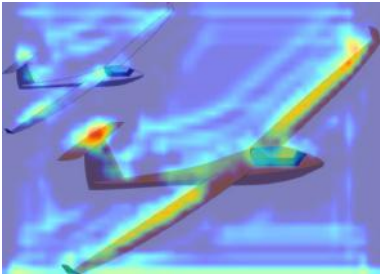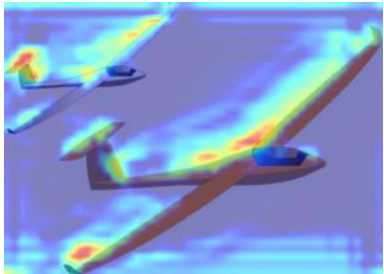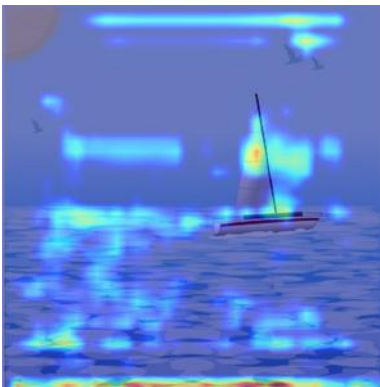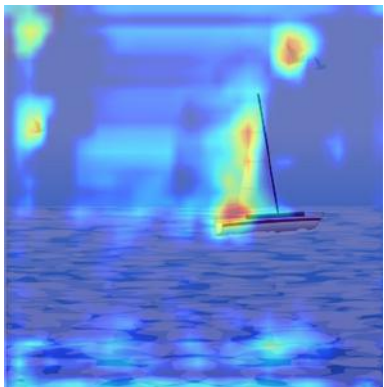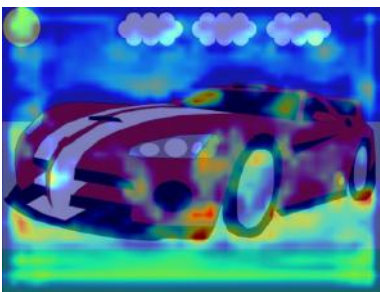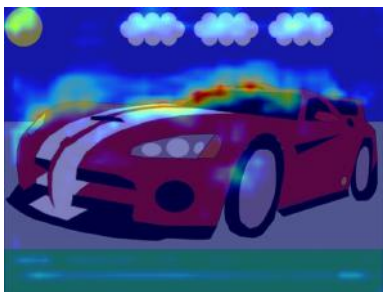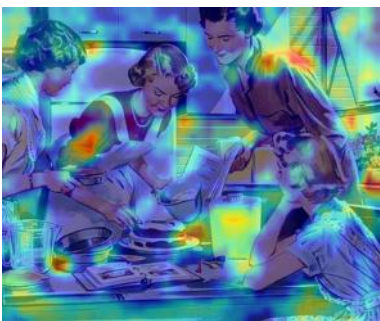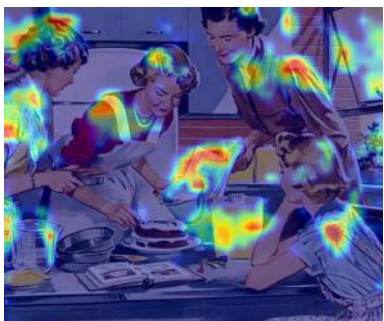

*image*

*boxcrop*

Supplement: Supplementary file 8 [file 123610715-supp.zip]

FRCNN

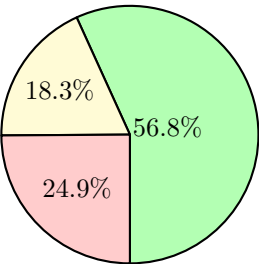OSHOT ( $\gamma = 0$ )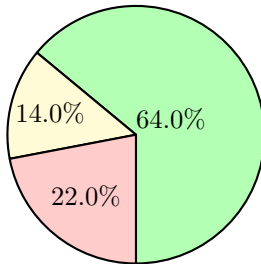OSHOT ( $\gamma = 30$ )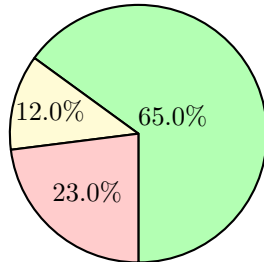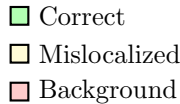

Supplement: Supplementary file 9 [file 123610715-supp.zip]

FRCNN

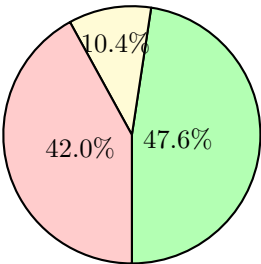OSHOT ( $\gamma = 0$ )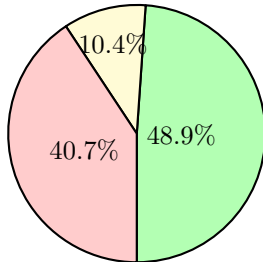OSHOT ( $\gamma = 30$ )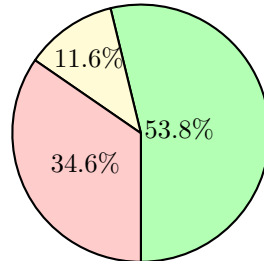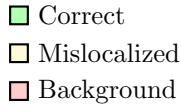

Supplement: Supplementary file 10 [file 123610715-supp.zip]
